1 **MAVS mediates a protective immune response in the brain to Rift Valley fever virus**

2

3 Nicholas R. Hum<sup>1</sup>, Feliza A. Bourguet<sup>1</sup>, Aimy Sebastian<sup>1</sup>, Doris Lam<sup>1</sup>, Ashlee M. Phillips<sup>1</sup>,  
4 Kristina R. Sanchez<sup>1, #a</sup>, Amy Rasley<sup>1</sup>, Gabriela G. Loots<sup>1,2</sup>, Dina R. Weilhammer<sup>1\*</sup>

5

6

7 <sup>1</sup> Biosciences and Biotechnology Division, Lawrence Livermore National Laboratory,  
8 Livermore, CA, USA

9 <sup>2</sup> School of Natural Sciences, University of California Merced, Merced, CA 94550, USA

10 <sup>#a</sup>Current address: Immunology Graduate Group, University of California, Davis, Davis, CA  
11 95616, USA

12

13

14 \*Corresponding author

15 Email: [weilhammer1@llnl.gov](mailto:weilhammer1@llnl.gov)

16

17 Short title: Innate immunity in the brain to Rift Valley fever virus

18

19 Keywords:

20 Rift Valley fever virus, microglia, MAVS, scRNA-seq, IFN signaling,

21

22

## 23 Abstract

24

25 Rift Valley fever virus (RVFV) is a highly pathogenic mosquito-borne virus capable of causing  
26 hepatitis, encephalitis, blindness, hemorrhagic syndrome, and death in humans and livestock.  
27 Upon aerosol infection with RVFV, the brain is a major site of viral replication and tissue  
28 damage, yet pathogenesis in this organ has been understudied. Here, we investigated the immune  
29 response in the brain of RVFV infected mice. In response to infection, microglia initiate robust  
30 transcriptional upregulation of antiviral immune genes, as well as increased levels of activation  
31 markers and cytokine secretion that is dependent on mitochondrial antiviral-signaling protein  
32 (MAVS) and independent of toll-like receptors 3 and 7. *In vivo*, *Mavs*<sup>-/-</sup> mice displayed enhanced  
33 susceptibility to RVFV as determined by increased brain viral burden and higher mortality.  
34 Single-cell RNA sequence analysis identified microglia-specific defects in type I interferon and  
35 interferon responsive gene expression in *Mavs*<sup>-/-</sup> mice, as well as dysregulated lymphocyte  
36 infiltration. The results of this study provide a crucial step towards understanding the precise  
37 molecular mechanisms by which RVFV infection is controlled in the brain and will help inform  
38 the development of vaccines and antiviral therapies that are effective in preventing encephalitis.

39

## 40 Author Summary

41

42 Rift Valley fever virus causes severe disease in humans and livestock and in some cases can be  
43 fatal. There is concern about the use of Rift Valley fever virus as a bioweapon since it can be  
44 transmitted through the air, and there are no vaccines or antiviral treatments. Airborne  
45 transmission of the virus causes severe inflammation of the brain, yet little is known about the  
46 immune response against the virus in this organ. Here, we investigated the immune response in  
47 the brain to Rift Valley fever virus following intranasal infection. We determined that microglia,  
48 the resident immune cells of the brain, initiate a robust response to Rift Valley fever virus  
49 infection and identified a key immune pathway that is critical for the ability of microglia to  
50 respond to infection. When this immune pathway is rendered non-functional, mice have a  
51 dysregulated response to infection in the brain. This study provides insight into how the immune  
52 response can control Rift Valley fever virus infection of the brain.

53

## 54 Introduction

55

56 Rift Valley fever virus (RVFV) (genus *Phlebovirus*/family *Bunyaviridae*), is a highly pathogenic  
57 mosquito-borne virus that can cause lethal disease in both humans and livestock, including acute-  
58 onset hepatitis, delayed-onset encephalitis, blindness, or hemorrhagic fever [1]. RVFV is  
59 endemic to Africa however concern exists about its potential spread across the world, similar to  
60 Zika or West Nile virus (WNV) [1]. Outside of Africa, competent vectors for RVFV include  
61 over 30 species of mosquitoes that are present throughout North and South America [2]. RVFV  
62 is also classified as a Category A Biodefense pathogen by the National Institute of Allergy and  
63 Infectious Diseases (NIAID) due to the potential for intentional spread by aerosol and the lack of  
64 licensed vaccines or antiviral therapeutics. Furthermore, RVFV is classified by the Department  
65 of Health and Human Services (HHS) and United States Department of Agriculture (USDA) as  
66 an overlap select agent due to the susceptibility of numerous livestock species to this disease [3].

67

68 In the event of an intentional release, the most likely route of exposure to RVFV would be  
69 through the respiratory system via aerosolized release of the virus. Studies conducted using  
70 rodent models indicate a more severe infection following respiratory versus subcutaneous  
71 exposure, with higher incidence of lethality, neuropathology, and increased viral titers in the  
72 brain [4-7]. Analysis of human infections also suggests that aerosol exposure to RVFV (i.e.,  
73 laboratory acquired infections and infections acquired via handling of infected livestock) leads to  
74 a higher incidence of severe disease with encephalitis and long-lasting neurologic complications  
75 [8, 9]. The fatality rate amongst patients with encephalitic manifestations of disease is ~50%  
76 [10], which is much higher than the overall fatality rate, estimated to be between 0.5-2% [11].  
77 Thus, a thorough understanding of RVFV pathogenesis in the brain is required for preparedness  
78 to combat the virus' worst outcomes, including intentional release of the virus.

79  
80 The term "immune privileged site" was once applied to the brain and interpreted to mean that  
81 few immune defenses were functional in this organ [12]. However, it is now widely accepted that  
82 the brain is highly immunologically active [13]. An emerging body of evidence indicates that  
83 immune responses within the brain are critical for control of an array of neuroinvasive viruses  
84 [14, 15]. In the brain, neurons, and glial cells (e.g., astrocytes, and microglia), express many of  
85 the same pattern recognition receptors (PRRs) expressed by cells in the periphery and initiate  
86 type I interferon (IFN) expression as well as other innate responses upon viral infection [15, 16].  
87 Such early responses in the brain are critical for direct control of viral replication, as well as for  
88 recruitment of adaptive immune cells that participate in viral clearance [17, 18]. Microglia, the  
89 resident immune cells of the brain, play a key role in bridging innate and adaptive immune  
90 responses in the brain [19-21], and depletion of microglia increases susceptibility to multiple  
91 viral infections [18, 22, 23]. Although potent immune responses are required for viral control in  
92 the brain, limiting inflammation presents a unique immunoregulatory challenge as excessive  
93 inflammation can be especially deleterious and promote neurodegenerative diseases such as  
94 Parkinson's [24] and Alzheimer's [25] disease. Thus, investigation of immune responses in the  
95 brain presents an opportunity to understand the interaction of processes that hone the correct  
96 response to control viral replication without inducing excessive damaging inflammation.

97  
98 To date, there has been limited investigation of the immune response to RVFV in the brain.  
99 Previous work has indicated that a strong adaptive response involving both CD4 and CD8 T cells  
100 as well as a robust antibody response is required for the prevention of encephalitic disease [7, 26,  
101 27] yet there remains a lack of understanding of the response of resident and infiltrating immune  
102 cells in the brain. Furthermore, the PRRs that microglia use to respond to RVFV infection have  
103 not yet been identified. Previous work has demonstrated the critical role of RIG-I-like receptor  
104 (RLR) signaling *via* mitochondrial antiviral signaling (MAVS) in the type I IFN response of  
105 macrophages and dendritic cells (DCs) to RVFV infection, as well as a protective role for MAVS  
106 following *in vivo* challenge, with little to no contribution from the RNA-sensing toll-like  
107 receptors (TLRs) [6]. However, differential roles for the RNA-sensing PRRs during viral  
108 infections of the CNS have been identified, most notably for WNV, where TLR3, TLR7, and  
109 RLR receptors RIG-I and MDA-5 have been shown to coordinate and propagate a protective  
110 response [28-30]. Identifying the relative contributions of innate signaling pathways to the  
111 induction of type I IFNs and subsequent control of viral infection has important consequences in  
112 terms of understanding human susceptibility to RVFV infection, as polymorphisms in TLR3,

113 TLR7, their respective downstream signaling adaptors TRIF and MyD88, as well as RIG-I and  
114 MAVS have all been associated with severe disease/neuropathology in humans [31].

115  
116 Here, we investigated the immune response in the murine brain to RVFV intranasal infection.  
117 We demonstrate that microglia mount a robust response that is dependent on MAVS and  
118 independent of TLR3 and TLR7. MAVS is critical for the expression of immunoregulatory  
119 genes, secretion of cytokines, and upregulation of surface markers of activation. *Mavs*<sup>-/-</sup> mice are  
120 more susceptible to infection, with higher viral titers in the brain following intranasal challenge.  
121 RNA sequence (RNA-seq) analysis of whole brain tissue revealed robust immune gene  
122 expression with greater induction of inflammatory genes in the brains of *Mavs*<sup>-/-</sup> versus wild type  
123 (WT) mice. Single cell RNA-sequence (scRNA-seq) analysis revealed defects in specific  
124 antiviral genes and signaling pathways within microglia in the brains of RVFV infected *Mavs*<sup>-/-</sup>  
125 mice. The lack of MAVS resulted in a shift towards a more inflammatory phenotype, with a  
126 decrease in antiviral signaling pathways and an increase in proinflammatory pathways within  
127 *Mavs*<sup>-/-</sup> microglia. Differences in immune infiltration into the brain were also observed between  
128 WT and *Mavs*<sup>-/-</sup> mice. These results are an important step towards understanding the cell types  
129 and molecular pathways responsible for controlling RVFV infection in the brain and towards  
130 future developments of antiviral treatments.

## 131 132 **Results**

133  
134 *RVFV infection induces a robust response in microglia that is dependent upon Mavs and*  
135 *independent of Tlr3 and Tlr7*

136  
137 To determine if microglia respond to RVFV infection directly *via* cell intrinsic mechanisms, we  
138 first confirmed infection of microglia cell lines EOC 13.31 and SIM A9, as well as primary  
139 microglia derived from the brains of neonatal mice *via* flow cytometry using a RVFV-specific  
140 antibody (Figure 1A and B). Vero cells were also included as a positive control for infection.  
141 EOC 13.31 cells had the lowest infectivity rate ranging from 30-40% positive cells, while  
142 primary microglia displayed infectivity rates (50-70%) similar to SIM A9 cells (60-70%) but  
143 slightly less effective than the Vero positive control (90%) (Figure 1B). Both the fully virulent  
144 (ZH501) and attenuated (MP-12) strains of RVFV yielded similar levels of infected primary  
145 microglia (Figure 1C). Next, we probed the response of primary microglia to both the ZH501  
146 and MP-12 strains by quantifying changes in expression of genes involved in antiviral immune  
147 responses using real-time reverse transcription (RT<sup>2</sup>) PCR array (Figure 1D and Table S1). There  
148 was a significant response to both viruses with similar patterns of gene expression changes,  
149 although the overall magnitude of the response was greater in microglia infected with the  
150 attenuated versus the fully virulent strain, consistent with prior reports [32]. The response to MP-  
151 12 was robust, with very high levels of *Ifnb1* expression (greater than 7,000-fold upregulation)  
152 and greater than 10-fold upregulation of over 20 genes, including *Ifna2*, *Ifih1*, *Isg15*, *Cxcl10*, *Il6*,  
153 and *Il12b*, among others.

154  
155 Next, microglia derived from WT, *Tlr3*<sup>-/-</sup>, *Tlr7*<sup>-/-</sup>, or *Mavs*<sup>-/-</sup> mice were infected with MP-12, and  
156 a similar infectivity rate was confirmed amongst all groups, therefore was independent of  
157 genotype (Figure S1). Microglia derived from TLR3 or TLR7 deficient animals activated  
158 immune genes in response to RVFV at levels similar to WT microglia (Figure 2A and B and

159 Table S1). In contrast, microglia derived from *Mavs*<sup>-/-</sup> mice displayed an abrogated response to  
160 infection, with minimal changes in gene expression in most genes in the array and a greater than  
161 4,000-fold reduction in *Ifnb1* expression versus WT infected microglia (Figure 2C and Table  
162 S1).

163  
164 We further characterized the role of MAVS in the response of microglia to RVFV infection *in*  
165 *vitro* by assessing expression of microglial activation markers as well as cytokine secretion  
166 (Figure 3). Microglia upregulated surface expression of CD86, CD80, and I-A/I-E in a MAVS-  
167 dependent manner (Figure 3A). Using RVFV antibody staining, cells within infected cultures  
168 could be identified as infected (RVFV<sup>+</sup>) or uninfected (RVFV<sup>-</sup>). Expression was upregulated not  
169 only on infected microglia (RVFV<sup>+</sup>), but also on uninfected cells within the culture (RVFV<sup>-</sup>),  
170 suggesting secreted cytokines can influence the activation state of cells in trans. Within WT  
171 microglia, expression of each marker was highest on infected cells, with an intermediate level of  
172 expression seen on cells activated in trans. On *Mavs*<sup>-/-</sup> microglia, apart from a low level of CD80  
173 on infected cells, no significant upregulation of activation markers was observed. In contrast,  
174 upregulation of activation markers was unaltered from WT on *Tlr3*<sup>-/-</sup> and *Tlr7*<sup>-/-</sup> microglia (Figure  
175 S2).

176  
177 Cytokine secretion by infected microglia was also dependent on MAVS (Figure 3B). High levels  
178 of type I IFNs were detected in supernatants from WT infected cells, as well the inflammatory  
179 cytokines IL-6 and TNF- $\alpha$ , and chemokines CCL5, CXCL10, CXCL11, and CCL2. Cytokine  
180 levels in supernatants from MAVS-deficient cells were either not detectable, or not significantly  
181 different from uninfected supernatants. Taken together, these data demonstrate that microglia  
182 have a robust response to RVFV infection that is mediated primarily through the RLR signaling  
183 adaptor MAVS.

184  
185 *Mavs*<sup>-/-</sup> animals have a dysregulated immune response with increased susceptibility to infection

186  
187 We then investigated the role of MAVS in the immune response in the brain during *in vivo*  
188 challenge with RVFV (Figure 4). Intranasal challenge of WT and *Mavs*<sup>-/-</sup> cohorts of mice (n=20)  
189 with the ZH501 strain of RVFV confirmed enhanced susceptibility to infection of *Mavs*<sup>-/-</sup> mice,  
190 consistent with prior reports [6]. *Mavs*<sup>-/-</sup> mice succumbed to challenge significantly faster, with  
191 100% of *Mavs*<sup>-/-</sup> mice deceased by 6 days post infection, whereas 20% of WT animals were still  
192 alive 10 days post infection (Figure 4A). To capture early innate antiviral responses, we  
193 conducted a longitudinal study over 4 days, where infected brains of WT mice were examined *ex*  
194 *vitro* to determine when live virus (MP-12) could be cultured from brain tissue following  
195 intranasal challenge (Figure S3). Day 7 post-infection was identified as the earliest timepoint live  
196 virus could be detected in infected WT brains. Next, we compared viral levels at day 7 post  
197 infection with MP-12 between WT and *Mavs*<sup>-/-</sup> mice and were able to detect infection in 100% of  
198 *Mavs*<sup>-/-</sup> (n=11), but only in 42% of WT (n=12) infected brains. Within brains with detectable  
199 virus, titers of live virus as well as the levels of RVFV genomic RNA were significantly higher  
200 in *Mavs*<sup>-/-</sup> than in WT mice (Figure 4B).

201  
202 To assess the antiviral response, we utilized RNA-seq to profile the transcriptomic alterations  
203 induced by RVFV infection in the brains of WT and *Mavs*<sup>-/-</sup> mice. Infection resulted in  
204 significant upregulation of 1,069 genes in the brains of WT mice and 1,116 genes in the brains of

205 *Mavs*<sup>-/-</sup> mice where 600 upregulated genes were in common to both WT and *Mavs*<sup>-/-</sup> (Figure 4C  
206 and Table S2). Downregulation of genes in response to infection displayed less overlap between  
207 WT and *Mavs*<sup>-/-</sup>, with 977 downregulated in WT, 729 downregulated in *Mavs*<sup>-/-</sup>, and only 165  
208 downregulated genes common to both genotypes (Figure 4C). Functional enrichment of  
209 differentially expressed genes revealed strong correlation of pathways related to innate immune  
210 and defense responses in both WT and *Mavs*<sup>-/-</sup> brains, including response to other organism  
211 (GO:0051707), innate immune response (GO:0045087), response to cytokine (GO:0034097),  
212 and cytokine production (GO:0001816) (Figure 4D).

213  
214 To identify deficiencies in the antiviral response within *Mavs*<sup>-/-</sup> brains that would indicate the  
215 effector functions downstream of MAVS signaling that control viral replication, we focused on  
216 pathways that were enriched in WT and unaffected in *Mavs*<sup>-/-</sup> infected brains. Interestingly, only  
217 two pathways were enriched in WT and not *Mavs*<sup>-/-</sup> yet neither are involved in immune responses  
218 nor indicate any functional advantage WT animals have at controlling viral replication (Figure  
219 4D). *Mavs*<sup>-/-</sup> brains had more exclusively enriched pathways, including regulation of cytokine  
220 production (GO:0001817) and inflammatory response (GO:0006954), indicating that the overall  
221 levels of inflammation were higher in *Mavs*<sup>-/-</sup> brains than in WT. This is consistent with previous  
222 reports that indicated a more robust serum cytokine response in *Mavs*<sup>-/-</sup> than WT mice infected  
223 with RVFV [6].

224  
225 IFN  $\alpha/\beta$  gene expression levels were elevated in WT infected brains, whereas induction was not  
226 seen in *Mavs*<sup>-/-</sup> brains (Figure 4E). However, global upregulation of type I interferon signaling  
227 was not observed in the whole brain between WT and *Mavs*<sup>-/-</sup>. Thus, while a deficiency in type I  
228 interferons is noted in *Mavs*<sup>-/-</sup> brains, examination of downstream signaling does not reveal  
229 potential deficiencies in antiviral response genes. In total, the data demonstrate that RVFV  
230 infection results in robust activation of immune and inflammatory genes in both WT and *Mavs*<sup>-/-</sup>  
231 brains with very similar patterns of gene upregulation in both.

232  
233 *Single cell RNA sequencing reveals changes in immune infiltration and signaling defects in*  
234 *microglia following RVFV infection of Mavs*<sup>-/-</sup> *mice*

235  
236 Next, we performed scRNA-seq to increase the resolution of transcriptional analysis and assess  
237 cellular variations resulting from the absence of MAVS during RVFV infection of the brain.  
238 Single cell suspensions were generated from whole brain tissue of WT and *Mavs*<sup>-/-</sup> mice, with  
239 (WT+, *Mavs*<sup>-/+</sup>) and without (WT-, *Mavs*<sup>-/-</sup>) RVFV infection. The following cell numbers were  
240 sequenced from each condition: WT-: 1,989, *Mavs*<sup>-/-</sup>: 1,749, WT+: 1627, *Mavs*<sup>-/+</sup>: 1841, for a  
241 total of 7,206 cells. Unsupervised clustering of the data resulted in 15 cell type clusters (Figure  
242 5A). By cross-referencing genes differentially expressed in each cluster to previously published  
243 cell-type specific markers [33-36], we assigned each cluster to its putative cell-type identity  
244 (Figure 5C). We identified expected cell clusters such as neurons, astrocytes, oligodendrocytes,  
245 and endothelial cells. Three clusters of immune cells were identified, corresponding to  
246 microglia/myeloid cells, T/natural killer (NK) cells, and neutrophils. We observed a large shift in  
247 the relative frequency of immune cells upon infection, indicating massive immune infiltration in  
248 the brains of infected animals (Figure 5B and D). Sequenced cells from uninfected brains were  
249 comprised of 70-80% non-immune cells (clusters 1, 2, 4-9, and 11), with immune cells (clusters  
250 0, 3 and 10) comprising less than 30%. In contrast, sequenced cells from infected brains were

251 comprised of 30-40% non-immune and more than 60% immune cells (Figure 5B and D).  
252 Interestingly, the pattern of immune infiltration differed between WT and *Mavs*<sup>-/-</sup> infected brains.  
253 WT animals exhibited infiltration of mostly myeloid lineage cells, whereas *Mavs*<sup>-/-</sup> animals  
254 exhibited infiltration of lymphocyte populations in addition to myeloid lineage cells (Figure 5D).  
255 Immune infiltration was confirmed using flow cytometry (Figure 5 E-G) and was consistent with  
256 scRNA-seq ratios. Lymphocytes and non-gial cells of myeloid lineage comprised a very small  
257 fraction of immune cells within uninfected brains, ranging from 0.5-4% and 1-6% of brain  
258 immune cells, respectively (Figure 5F and G). In contrast, the percentage of non-gial myeloid  
259 cells increased to 10-25% of brain immune cells in both WT and *Mavs*<sup>-/-</sup> infected mice (Figure  
260 5F). Lymphocytes also increased in the brains of both WT and *Mavs*<sup>-/-</sup> infected mice, however  
261 significantly more lymphocytes were observed in the brains of *Mavs*<sup>-/-</sup> mice (Figure 5G), with  
262 lymphocytes comprising 5-15% of brain immune cells in WT mice and 15-30% of brain immune  
263 cells in *Mavs*<sup>-/-</sup> mice.

264  
265 Clustering of microglia/myeloid cells (cluster 0, Figure 5A) identified 6 subclusters of myeloid  
266 cells (Figure 6A). Enumeration of cells according to condition suggested that most immune cells  
267 present in uninfected brains were microglia, whereas infected brains contained cells of multiple  
268 infiltrating lineages including monocytes, antigen presenting cells (APCs), and granulocytic cells  
269 (Figure 6B and D). The distribution of myeloid lineage cells in uninfected brains confirmed the  
270 flow cytometry data in Figure 5E and is consistent with previously published reports [37] which  
271 indicate that microglia are the predominant immune cell type in the brain under non-pathological  
272 conditions. The relative frequency of macrophages (cluster 4) was consistent across conditions  
273 and likely corresponds to resident non-parenchymal macrophages [38], rather than an infiltrated  
274 population. Infected brains of both genotypes demonstrated similar patterns of monocyte, APC,  
275 and granulocytic cell infiltration (clusters 2, 3, and 5, respectively). Overall, the distribution of  
276 myeloid cells was similar between infected brains of both genotypes.

277  
278 Next, we examined transcriptional differences in the antiviral responses of microglia derived  
279 from WT and *Mavs*<sup>-/-</sup> infected brains. Differences in type I IFN (*Ifnb1* and *Ifna2*) expression  
280 were noted in a subset of microglia in WT infected brains whereas levels were undetectable in  
281 microglia from *Mavs*<sup>-/-</sup> infected and uninfected brains of both genotypes (Figure 6E). Gene  
282 ontological analysis revealed specific enrichment of pathways involved in antiviral responses  
283 including response to virus (GO:009615), negative regulation of viral genome replication  
284 (GO:0045071), antigen processing and presentation (GO:0019882), and response to type I  
285 interferon (GO:0034340) within WT infected microglia (Figure 6F). In contrast, inflammatory  
286 pathways such as response to interleukin-1 (GO:007055) and positive regulation of interleukin-6  
287 production (GO:0032755), as well as pathways involved in cell migration such as regulation of  
288 chemokine production (GO:0032642) and positive regulation of cell adhesion (GO:0045785)  
289 were enriched in *Mavs*<sup>-/-</sup> microglia (Figure 6G). Specific IFN-stimulated genes (ISGs) were  
290 expressed at higher levels within WT microglia, including *Irf7*, *Isg20*, *Isg15*, *Oasl1*, *Ifit1*, *Ifit3*,  
291 *Ifi2712a*, and *Bst2* (Figure 6H). Genes that have been previously associated with a pro-  
292 inflammatory state [39-41] were expressed at higher levels within *Mavs*<sup>-/-</sup> microglia, including  
293 *Irf1*, *Irf8*, *Il1b*, and *Nos2* (Figure 6H).

294  
295 Flow cytometric analysis revealed further defects in *Mavs*<sup>-/-</sup> microglia. In line with increased  
296 viral titers in the brains of *Mavs*<sup>-/-</sup> animals (Figure 4B), microglia from *Mavs*<sup>-/-</sup> animals displayed

297 dramatically higher levels of infection as evidenced by anti-RVSV antibody staining, ranging  
298 from 0.5-9% in WT brains to 15-50% in *Mavs*<sup>-/-</sup> brains (Figure 6I). We also evaluated the surface  
299 expression levels of activation markers; expression of CD86 mirrored *in vitro* results, with WT  
300 microglia that are RVSV<sup>+</sup> expressing the highest levels of CD86, and microglia from infected  
301 brains that are RVSV<sup>-</sup> expressing an intermediate level of CD86, although not significantly  
302 different from microglia from uninfected brains (Figure 6J). There was no significant  
303 upregulation of CD86 on microglia from *Mavs*<sup>-/-</sup> brains. Expression of I-A/I-E was also elevated  
304 on RVSV<sup>+</sup> microglia, although not on RVSV<sup>-</sup> microglia, from WT infected brains (Figure 6K).  
305 In contrast to *in vitro* results, upregulation of I-A/I-E was detected on microglia derived from  
306 *Mavs*<sup>-/-</sup> brains (Figure 6K). No significant upregulation of CD80 was detected (Figure S4).

307

### 308 *Lymphocyte infiltration and signaling defects in the brains of Mavs*<sup>-/-</sup> mice

309

310 The majority of lymphocytes identified within WT infected brains were NK cells, whereas those  
311 in *Mavs*<sup>-/-</sup> infected brains included a large number of T cells in addition to NK cells (Figure 7A-  
312 D). Lymphocytes comprised greater than 30% of the total sequenced cells in the *Mavs*<sup>-/-</sup> infected  
313 condition (Figures 5D and 7D). Upon examining genes that were differentially expressed  
314 between WT and *Mavs*<sup>-/-</sup> lymphocytes, we observed defects in ISG expression (*Irf7*, *Ifi44*, *Xcl1*),  
315 as well as genes involved in T and NK cell-mediated killing (*Prf1*, *Gzmb*, *Ifng*) [42] within  
316 lymphocytes from *Mavs*<sup>-/-</sup> infected animals (Figure 7E), suggesting that *Mavs*<sup>-/-</sup> cells are less  
317 efficient in clearing the virus than WT cells [43-45]. Consistent with this, we observed reduced  
318 expression of *Il15*, *Il18*, and *Il27*, cytokines that have a stimulatory effect on T and NK cells [46-  
319 49], in microglia from infected *Mavs*<sup>-/-</sup> mice (Figure S5). Lower levels of IFN- $\gamma$  protein were also  
320 detected in the brains of *Mavs*<sup>-/-</sup> versus WT infected mice (Figure 7G). Taken together, these  
321 results suggest that a defective response of *Mavs*<sup>-/-</sup> microglia may lead to the reduced capacity of  
322 T and NK cells to control RVSV infection.

323

## 324 **Discussion**

325

326 Despite the major role of pathogenesis in the brain for the most severe outcomes of RVSV  
327 infection, there has been little investigation of local antiviral immune responses within this  
328 organ. Here, we investigated the innate immune response in the brain to RVSV in a mouse model  
329 of intranasal infection. We demonstrated that microglia mount a robust response to RVSV that is  
330 dependent on MAVS and independent of TLR3 and TLR7. To probe viral pathogenesis in the  
331 brain in the presence and absence of a functional innate immune response, we profiled the brains  
332 of WT and *Mavs*<sup>-/-</sup> animals following intranasal infection with RVSV. *Mavs*<sup>-/-</sup> animals  
333 succumbed to infection more rapidly and with significantly higher viral titers in the brain. Viral  
334 presence in the brain corresponded with massive immune infiltration in both WT and *Mavs*<sup>-/-</sup>  
335 mice, consisting mostly of myeloid lineage cells as well as some lymphocytes, with significantly  
336 more T and NK cells in the brains of *Mavs*<sup>-/-</sup> animals. Robust immune gene expression was  
337 observed in the brains of both WT and *Mavs*<sup>-/-</sup> infected animals, with greater inflammatory gene  
338 expression within *Mavs*<sup>-/-</sup> brains. Deficiencies in type I IFN expression were noted within whole  
339 brain tissue as well as specifically within microglia in *Mavs*<sup>-/-</sup> infected animals, and furthermore,  
340 microglia from *Mavs*<sup>-/-</sup> animals displayed deficiencies in downstream antiviral signaling  
341 pathways and specific ISG expression. T and NK cells from *Mavs*<sup>-/-</sup> animals were also deficient



342 in ISG expression, as well as genes related to killing functions. Furthermore, decreased *Ifng*  
343 expression resulted in lower levels of IFN- $\gamma$  protein in the brain.

344  
345 A summary of previous studies using mouse models of infection suggests that failure to establish  
346 a robust peripheral immune response to RVFV infection allows for viral spread to the brain, and  
347 exposure via the respiratory route increases the likelihood of bypassing such a protective  
348 response [4, 5, 26, 27, 50]. Thus, these studies suggest that the primary function of a protective  
349 response is to prevent the virus from ever reaching the brain. However, a recent study using a rat  
350 model of infection provided additional insight into the role of immune responses within the  
351 brain. Albe *et. al* [7] observed that rats infected subcutaneously with RVFV had detectable viral  
352 RNA in the brain as early as one day post infection despite lacking overt signs of disease.  
353 Furthermore, T cell infiltration into the brain was associated survival of infection, suggesting that  
354 functional T cell responses in the brain are ultimately capable of clearing infection and  
355 promoting survival and recovery. Rats exposed to aerosolized RVFV did not display T cell  
356 infiltration in the brain, and ultimately succumbed to infection. This study is consistent with the  
357 hypothesis that the lack of a robust peripheral immune response leads to increased pathogenesis  
358 within the brain, however it suggests that extension of peripheral responses to the brain is critical  
359 for the resolution of RVFV infection. Our present work indicates that innate immune responses  
360 to RVFV are robustly active within the brain. Thus, the role that cells within the brain play in  
361 recruiting and orchestrating a protective response warrants further investigation.

362  
363 Microglia express a number of PRRs and respond to a wide variety of infectious agents in a  
364 diverse manner and can alternately establish an anti- or pro-inflammatory environment,  
365 depending on the specific genes that are induced as well as differing factors in the surrounding  
366 environment [51, 52]. Our results indicate that RVFV readily infects microglia, which then  
367 primarily utilize the RLR pathway via the signaling adaptor MAVS to detect and respond to  
368 RVFV infection. *In vitro*, microglia derived from *Mavs*<sup>-/-</sup> animals displayed abrogated antiviral  
369 responses including diminished type I IFN and IFN-responsive gene expression and diminished  
370 capacity to upregulate surface markers of activation or secrete cytokines. Despite being severely  
371 attenuated, some response to infection was still noted, therefore we cannot rule out a minor role  
372 for other receptor(s) in the response of microglia to RVFV infection. Evaluation *in vivo* within  
373 *Tlr3*<sup>-/-</sup> or *Tlr7*<sup>-/-</sup> mice may reveal a role for these receptors, which might vary in importance  
374 within specific cell and tissue types.

375  
376 The response of microglia to RVFV infection *in vivo* was also dependent on MAVS. Using  
377 scRNA-seq, we demonstrated that microglia in WT infected brains express type I IFNs and  
378 interferon responsive genes. Pathways that were enriched in WT microglia versus *Mavs*<sup>-/-</sup>  
379 included response to virus and negative regulation of viral genome replication, indicating that  
380 WT microglia have a greater capacity to control viral infection. Specific ISGs with demonstrated  
381 antiviral activity were elevated including *Ifit1* and *Ifit3*, both of which have previously been  
382 shown to bind RVFV genomic RNA and have inhibitory activity on viral growth [53]. BST-2 has  
383 previously been shown to inhibit replication of several viruses, including HIV-1 and Lassa Virus,  
384 but was not capable of inhibiting RVFV replication in the cell types tested [54, 55]. Further  
385 investigation is required to determine if these ISGs have anti-RVFV activity in microglia. Other  
386 ISGs that were among the 20 most upregulated genes in WT microglia include master regulatory  
387 genes *Irf7* and *Isg15*, broad spectrum exonuclease *Isg20*, *Ifi2712a*, which has been shown to

388 have antiviral activity against WNV [56], and *Oasl1*, which can regulate *Irf7* expression [57].  
389 Using flow cytometry, we demonstrated that WT microglia upregulate CD86 and I-A/I-E on the  
390 cell surface in response to RVFV infection. Upregulation of surface markers was restricted to  
391 microglia that were RVFV<sup>+</sup>, which were of relatively low abundance in WT brains. Separating  
392 microglia from infected brains into RVFV<sup>+</sup> and RVFV<sup>-</sup> populations was restricted to antibody  
393 staining and was not possible using scRNA-seq due to the sequencing technology being unable  
394 to capture RVFV genomic RNA. While we cannot ascertain which sequenced microglia were  
395 infected or uninfected, it can be inferred that the changes in gene expression observed within WT  
396 microglia were induced largely in trans in response to secreted factors from neighboring cells  
397 due to the low levels of infection detected by antibody staining.

398  
399 In contrast, microglia from *Mavs*<sup>-/-</sup> brains displayed much higher levels of infection, ranging  
400 from 15-50% of the total microglia. *Mavs*<sup>-/-</sup> microglia did not express type I IFNs, and  
401 upregulated genes enriched in inflammatory processes such as response to interleukin-1 and  
402 positive regulation of interleukin-6. *Mavs*<sup>-/-</sup> microglia upregulated surface expression of I-A/I-E,  
403 on both RVFV<sup>+</sup> and RVFV<sup>-</sup> microglia *in vivo*. Antigen processing and presentation was observed  
404 transcriptionally only within WT microglia, therefore the functional significance of I-A/I-E  
405 expression is unclear. Interestingly, *Irf1*, *Irf8*, and *Il1b* were amongst the genes most upregulated  
406 in *Mavs*<sup>-/-</sup> microglia versus WT. Previous studies utilizing a mouse model of nerve injury  
407 indicated increased *Il1b* expression by microglia that was dependent on *Irf1* and *Irf8* expression  
408 [39, 40]. These studies in conjunction with our present study suggest that different types of  
409 pathological insults can activate a common inflammatory state in microglia and further suggest  
410 that failure to establish an appropriate antiviral response may dispose the microglia to remain in  
411 a proinflammatory state.

412  
413 Our results highlight the importance of MAVS in orchestrating a protective immune response  
414 against RVFV infection in the brain. The lack of MAVS resulted in a dysregulated immune  
415 response, with more inflammatory gene expression and less functional adaptive immune  
416 responses. The brain infiltrating lymphocytes consisted of T and NK cells in both WT and *Mavs*<sup>-/-</sup>  
417 animals however more NK than T cells were observed in WT. Furthermore, the T and NK cells  
418 in the brains of *Mavs*<sup>-/-</sup> mice appear to be functionally deficient due to decreased expression of  
419 ISGs and genes related to killing functions. Thus, while more cells are recruited to the brain,  
420 likely due to the increased presence of viral antigen, they are less able to control viral replication.  
421 This is in line with previous studies investigating the role of MAVS in WNV infection which  
422 demonstrated increased infiltration of T cells with lower functional avidity into the brains of  
423 *Mavs*<sup>-/-</sup> mice [30, 58]. Further work is needed to characterize the functional deficiency of T cells  
424 in *Mavs*<sup>-/-</sup> mice during RVFV infection and to understand the molecular details that govern this  
425 deficiency. Moreover, the role of NK cells in RVFV infection has not been investigated, and our  
426 data suggests that NK cells may be actively recruited to the brain to help control RVFV  
427 infection. Interestingly, we observed increased expression of *Il15*, *Il18*, and *Il27*, which have been  
428 shown to activate T and NK cells [46-49], in WT microglia and other myeloid cells. Secretion of  
429 these cytokines may be one mechanism by which microglia regulate the cytotoxic activity of  
430 lymphocytes, and lack of expression in *Mavs*<sup>-/-</sup> microglia could be playing a role in the defective  
431 lymphocyte responses observed in these animals. Future studies will explore the relationship  
432 between secreted factors from microglia and the induction of protective T and NK cell responses  
433 during RVFV infection of the brain. Taken together, previous studies and our present study

434 indicate that RLR signaling through MAVS is required not only to control viral replication early  
435 but is also necessary to induce a fully functional adaptive response.

436

437 In summary, this present work provides a better understanding of the immune response in the  
438 brain to RVFV infection. Furthermore, it defines a protective role for MAVS in propagating  
439 antiviral responses in the brain and suggests that signaling through MAVS may also be required  
440 for functional T and NK cell responses in the brain. Better understanding of the immune  
441 responses that are active against RVFV in the brain may contribute to therapeutics that  
442 effectively harness or augment these responses and lead to treatments for encephalitic disease.

443

## 444 **Materials and Methods**

445

### 446 **Cells and viruses**

447 Vero, EOC 13.31, SIM A9, and LADMAC cells were obtained from the American Type Culture  
448 Collection (ATCC). Cell lines were maintained in the following culture media: Vero: Dulbecco's  
449 modified Eagle's medium (DMEM) supplemented with 10% fetal bovine serum (FBS). EOC  
450 13.31: DMEM supplemented with 10% FBS and 20% LADMAC conditioned media to provide a  
451 source of CSF-1 to support microglial growth [59]. SIM-A9: DMEM:F12 supplemented with  
452 10% FBS and 5% horse serum. LADMAC: Minimal essential medium supplemented with 10%  
453 FBS. Primary glial cells: RPMI 1640 supplemented with 10% FBS and 0.01 mg/mL gentamicin  
454 and 0.25 µg/mL amphotericin. All media was supplemented with 100 units/ml penicillin and 100  
455 µg/ml streptomycin, and all cells were maintained at 37 °C in 5% CO<sub>2</sub>. All cell culture reagents  
456 were obtained from Thermo Fisher. LADMAC conditioned media was prepared by collecting  
457 supernatant from confluent cells that have been in culture for 5-7 days and centrifuged at 300 x g  
458 for 10 min to remove cellular debris.

459

460 Wild type Rift Valley fever virus (RVFV) strain ZH-501 was obtained from the NIH Biodefense  
461 and Emerging Infections Research Resources Repository, NIAID, NIH. The MP-12 strain was  
462 kindly provided by Oscar Negrete (Sandia National Laboratory). RVFV stocks were propagated  
463 in Vero cells as previously described [60, 61]. Titers of viral stocks were determined by standard  
464 plaque assay consisting of an agarose overlay and crystal violet staining. All work with the  
465 ZH501 strain was performed in Institutional Biosafety Committee approved BSL-3 and ABSL-3  
466 facilities at Lawrence Livermore National Laboratory using appropriate PPE and protective  
467 measures.

468

### 469 **Mice**

470

471 All animal work was conducted in accordance with protocols approved by the Lawrence  
472 Livermore National Laboratory Institutional Animal Care and Use Committee. C57BL/6 as well  
473 as mice genetically deficient in MAVS (B6;129-*Mavs*<sup>tm1Zjc/J</sup>; Jax stock No: 008634), TLR3  
474 B6;129S1-*Tlr3*<sup>tm1Flv/J</sup>; Jax Stock No: 005217), and TLR7 (B6.129S1-*Tlr7*<sup>tm1Flv/J</sup>; Jax stock No:  
475 008380) were obtained from Jackson Laboratory. For experiments using knockout (KO) mice,  
476 animals were crossed to WT C57BL/6 mice to generate a heterozygous F1 generation. F1  
477 littermates were crossed to generate homozygous WT and KO F2 progeny. Matched WT and KO  
478 animals from the same generation were used for each genotype. All animals were maintained in  
479 PHS-assured facilities.

480

## 481 **Isolation of primary microglia isolation**

482

483 Primary microglia were isolated and cultured as described previously [62, 63]. Briefly, brains  
484 from 1 – 4-day old neonatal mice were dissected to remove meninges and large blood vessels  
485 and finely minced with sterile surgical scissors. The minced tissue was then forced through a 70  
486  $\mu$ M cell strainer (Fischer Scientific) and rinsed with cold glial media. Cells were pelleted at 300  
487 x g for 10 min then resuspended in 20 mL fresh media and placed in a T75 flask (1 flask per 7 –  
488 9 brains) and maintained in culture for 2 weeks. Microglia were harvested from the mixed glial  
489 culture by shaking flasks for 4 h at 200 rpm using an orbital shaker. Cells were pelleted at 300 x  
490 g for 10 min and resuspended in 10 mL microglia growth media (glial media + 20% LADMAC  
491 conditioned media). Microglia from up to 3 T75 flasks were combined and placed in a T25 flask.  
492 Microglia were maintained in culture for up to one week before use in viral infection  
493 experiments.

494

## 495 ***In vitro* infection of microglia**

496

497 Microglia were plated in 24 well tissue culture treated plate at a density of 250,000 cells per well  
498 primary glial cell media. Cells were infected with RVFV at a MOI of 5 (qPCR analysis) or 2  
499 (flow cytometry/cytokine analysis) in primary glial cell media. Cells were incubated with virus  
500 for 4 h at 37 °C in 5% CO<sub>2</sub>. Viral infection media was then removed, and cells used for qPCR  
501 analysis were lysed for RNA extraction. Cells used for flow cytometry and cytokine analysis  
502 were washed one time with PBS, then replenished with fresh media and incubated for another  
503 18-24 h. Supernatants were then removed and stored at -80 °C for cytokine analysis, and cells  
504 were processed for flow cytometric analysis. Data for all *in vitro* assays is displayed as the  
505 average from 3 triplicate wells and is representative of an experiment performed at least twice.

506

## 507 **Cytokine analysis**

508

509 Cytokines were quantified using Legendplex multiplex bead-based assay (Biolegend) using the  
510 mouse anti-virus response panel according to manufacturer's instructions. Flow cytometry of the  
511 beads was performed using a FACS Aria Fusion and data were analyzed using Biolegend's  
512 cloud-based analysis software available at <https://legendplex.qognit.com>.

513

## 514 ***In vivo* infection**

515

516 Groups of male and female *Mavs*<sup>-/-</sup> and wildtype (WT) control littermates ranging in age from 8-  
517 12 weeks were inoculated intranasally with 5x10<sup>5</sup> (MP-12, n=12) or 1000 PFU (ZH501, n=20)  
518 RVFV while under anesthesia (4-5% isoflurane in 100% oxygen). Mice were monitored daily for  
519 signs of morbidity and animals were humanely euthanized upon signs of severe disease by CO<sub>2</sub>  
520 asphyxiation. For tissue harvest, animals were euthanized by CO<sub>2</sub> asphyxiation and the whole  
521 animal was perfused with 30 mL sterile PBS containing 50,000 U/L sodium heparin *via* the left  
522 ventricle.

523

## 524 **Brain tissue isolation and preparation**

525

526 Preparation of brain tissue for flow cytometric, RNA sequencing, cytokine, and viral titer  
527 analysis was performed as previously described [64]. Following euthanasia and perfusion, brains  
528 were removed and placed in digestion buffer (PBS pH 7.4 (Thermo Fisher) + liberase + DNase I  
529 (both from Roche) to a final concentration of 1.6 wunsch/mL and 0.5 mg/mL, respectively) on  
530 ice in a 1.5 mL tube. Brains were finely diced into 1-2 mm<sup>3</sup> pieces with small scissors. 3-4 pieces  
531 were placed into RNAlater (Qiagen) for gene expression analysis. The remaining tissue was  
532 digested at 37 °C for 30 min. EDTA was added to a final concentration of 10 mM to stop the  
533 digestion reaction. A cell suspension was generated by gentle pipetting followed by passage  
534 through a 70 µm cell strainer. The cell strainer was rinsed with PBS supplemented with 5% FBS  
535 to a total volume of 20 mL. Aliquots of this suspension were stored at -80 °C for cytokine and  
536 viral titer analysis. The remaining suspension was subjected to Percoll gradient centrifugation to  
537 purify mononuclear immune cells for flow cytometric analysis as previously described [64].  
538

### 539 **Flow cytometry**

540  
541 Cells were incubated for 30 min on ice in 100 µl Hank's balanced salt solution (Thermo  
542 Fisher) + 2% FBS with Fc block (1:100 dilution, clone 2.4G2; BD Biosciences) along with the  
543 following antibodies (all from BD Biosciences): CD45 APC-Cy7 (1:500, clone 30-F11), CD11b  
544 AF488 (1:500, clone M1/70), CD80 BV421 (1:200, clone 16-10A1), and CD86 PE-Cy7 (1:500,  
545 clone GL1). IA/I-E AF647 (1:500, clone M5/114.15.2; BioLegend). Cells were then fixed and  
546 permeabilized using BD Cytotfix/Cytoperm (BD Biosciences) according to manufacturer's  
547 instructions. Cells were then incubated with an anti-RVSV antibody (kindly provided by Dr.  
548 Robert Tesh and the World Reference Center of Emerging Viruses and Arboviruses) at 1:500  
549 dilution, followed by goat anti-mouse PE secondary antibody (1:1000, Santa Cruz  
550 biotechnology). Flow cytometry was performed using a FACSAria Fusion and data were  
551 analyzed using FlowJo software. Microglia, other myeloid lineage, and lymphocytes were  
552 resolved using CD45 and CD11b expression, with microglia identified as CD45<sup>int</sup> CD11b<sup>int</sup>,  
553 other myeloid as CD45<sup>hi</sup> CD11b<sup>hi</sup>, and lymphocytes as CD45<sup>hi</sup> CD11b<sup>-</sup> as previously described  
554 [64].  
555

### 556 **qPCR and bulk RNA seq analyses**

557  
558 RVSV genomic RNA was quantified in brain tissue as described previously [5, 26, 65]. To  
559 normalize between samples, results were normalized to GAPDH expression. For *in vitro* qPCR  
560 analysis of immune gene expression, RNA from infected and uninfected microglia was harvested  
561 at 4 h post infection using RNeasy plus kits, and cDNA was generated using RT<sup>2</sup> First Strand  
562 Synthesis kit (both from Qiagen) according to manufacturer's instructions. Real-time quantitative  
563 RT-PCR analysis of the samples was carried out using the mouse antiviral response RT<sup>2</sup> Profiler  
564 PCR array (Qiagen) on a 7900HT Fast Real-Time PCR system (Thermo Fisher) according to  
565 manufacturer's instructions. Data were analyzed using Qiagen's online analysis software  
566 available at <https://geneglobe.qiagen.com/us/analyze>. Data are shown as the log<sub>2</sub> fold change in  
567 gene expression in infected versus uninfected samples.  
568

569 For bulk sequencing analysis, RNA was harvested from RNAlater preserved brain tissue using  
570 RNeasy Plus kit. Poly(A)<sup>+</sup>-enriched cDNA libraries were generated using the Illumina TruSeq  
571 RNA Library Prep kit v2 (Illumina Inc). The 75 bp single-end reads were sequenced was

572 performed using an Illumina (Illumina Inc) NextSeq 500 instrument. Sequencing data quality  
573 was checked using FastQC software. Reads were mapped to the mouse reference genome  
574 (mm10) using STAR [66]. Read counts per gene locus were summarized with featureCounts  
575 [67]. Then the data was normalized using RUVseq [68] to correct for batch effects and other  
576 unwanted variations. Genes differentially expressed between uninfected and infected samples  
577 were identified using edgeR [69]. Gene ontology (GO) and pathway enrichment analysis was  
578 performed using functional annotation tool ToppGene [70]. Heatmaps were generated using  
579 heatmap.2 function in ‘gplots’ R package.

580

## 581 **Single cell RNA sequencing**

582

583 Mice were euthanized and perfused as described above. Isolated brain tissues were immediately  
584 processed using a modified protocol from [71]. Cortices were dissected in cold Hibernate A  
585 medium (BrainBits LLC) and sliced to approximately 0.5 mm before transferred to a 15 mL  
586 falcon tube with Hibernate A and B27 medium (HABG) (Thermo Fischer Scientific). Collected  
587 tissue samples in 15 mL conical tubes were warmed up to 30°C in a shaking water bath for 8  
588 minutes, before the HABG supernatant replaced with activated papain (34 U/mL, Worthington  
589 Biochemical Corporation) and the tubes placed back into the shaking water bath for tissue  
590 digestion (30°C, 150 rpm) for 30 minutes. Cells were released from the digested tissues by  
591 trituration using a fire-polished Pasteur pipette. Released cells were collected in the supernatant  
592 and filtered through a 70 mm MACS Smart Strainer (Miltenyi Biotec) into a new 15 mL conical  
593 tube. The single cell suspension was layered onto a Optiprep density gradient to separate cells  
594 from debris, after centrifugation (800 x g, 15 min, 22°C). The debris fraction was collected, and  
595 the gradient material diluted with HAGB before tubes were centrifuged (200 x g, 5 min, 22°C).  
596 The supernatant was aspirated, and ACK lysis buffer (Thermo Fisher Scientific) was added to  
597 the cell suspension remove any remaining red blood cells (5 min, RT). Hank’s balanced salt  
598 solution (Thermo Fisher) was added to the cell suspension containing the lysis buffer and tubes  
599 were centrifuged (200 x g, 5 min, 22°C). To remove dead cells from the single cell suspension, a  
600 Dead cell removal kit (Miltenyi Biotec) was used as directed by the vendor.

601

602 Cell pellets were resuspended in PBS with 0.04% non-acetylated BSA and counted on a  
603 Countess II automated cell counter prior to single-cell sequencing preparation using Chromium  
604 Single-cell 3’ GEM, Library & Gel Bead Kit v3 (10x Genomics Cat # 1000075) on a 10×  
605 Genomics Chromium Controller following manufacturers’ protocol. Sequencing data was  
606 demultiplexed, quality controlled, and analyzed using Cell Ranger (10x Genomics) and Seurat  
607 [72]. The Cell Ranger Single-Cell Software Suite was used to perform sample demultiplexing,  
608 barcode processing, and single-cell 3’ gene counting. Samples were first demultiplexed and then  
609 aligned to the mouse genome (mm10) using “cellranger mkfastq” with default parameters.  
610 Unique molecular identifier counts were generated using “cellranger count”. Further analysis  
611 was performed using Seurat [72]. First, cells with fewer than 500 detected genes per cell and  
612 genes that were expressed by fewer than 5 cells were filtered out. After pre-processing, we  
613 performed data normalization, scaling, and identified 2000 most variable features. Then, anchors  
614 for data integration were identified using the ‘FindIntegrationAnchors’ function. Next, these  
615 anchors were passed to the ‘IntegrateData’ function and new integrated matrix with all four  
616 datasets were generated. Subsequently, dimensionality reduction, clustering, and visualization

617 were performed in Seurat as described before [73]. Genes differentially expressed between  
618 clusters were identified using ‘FindMarkers’ function implemented in Seurat.

619

### 620 **Acknowledgements and Funding**

621

622 Funding for this research was provided by internal LLNL Laboratory Directed Research and  
623 Development funds (17-LW-038 and 22-ERD-038 to D.W.). The funders had no role in study  
624 design, data collection and analysis, decision to publish, or preparation of the manuscript. This  
625 work was performed under the auspices of the U.S. Department of Energy by Lawrence  
626 Livermore National Security, LLC, Lawrence Livermore National Laboratory under Contract  
627 DE-AC52-07NA27344.

628

### 629 **Author Contributions Statement**

630

631 D.W., N.H., and F.B. conceived and designed the experiments. D.W., F.B., N.H., A.P., D.L.,  
632 K.S., and A.R. conducted all *in vitro* and *in vivo* experiments described and D.W., N.H., F.B.,  
633 and A.S. performed the data analysis. D.W., N.H., and G.L. wrote the manuscript. All authors  
634 contributed to editing the manuscript and approved the final version.

635

### 636 **Conflict of Interest Statement**

637

638 The authors declare no conflict of interest.

639

640 **References**

- 641
- 642 1. Pepin M, Bouloy M, Bird BH, Kemp A, Paweska J. Rift Valley fever virus(Bunyaviridae:  
643 Phlebovirus): an update on pathogenesis, molecular epidemiology, vectors, diagnostics and  
644 prevention. *Vet Res.* 2010;41(6):61. doi: 10.1051/vetres/2010033. PubMed PMID: 21188836;  
645 PubMed Central PMCID: PMCPMC2896810.
  - 646 2. Rolin AI, Berrang-Ford L, Kulkarni MA. The risk of Rift Valley fever virus introduction  
647 and establishment in the United States and European Union. *Emerg Microbes Infect.* 2013;2:e81.  
648 doi: 10.1038/emi.2013.81.
  - 649 3. <https://www.selectagents.gov/sat/list.htm>.
  - 650 4. Reed C, Lin K, Wilhelmsen C, Friedrich B, Nalca A, Keeney A, et al. Aerosol Exposure  
651 to Rift Valley Fever Virus Causes Earlier and More Severe Neuropathology in the Murine  
652 Model, which Has Important Implications for Therapeutic Development. *PLOS Neglected*  
653 *Tropical Diseases.* 2013;7(4):e2156. doi: 10.1371/journal.pntd.0002156.
  - 654 5. Dodd KA, McElroy AK, Jones TL, Zaki SR, Nichol ST, Spiropoulou CF. Rift valley  
655 Fever virus encephalitis is associated with an ineffective systemic immune response and  
656 activated T cell infiltration into the CNS in an immunocompetent mouse model. *PLoS Negl Trop*  
657 *Dis.* 2014;8(6):e2874. Epub 2014/06/13. doi: 10.1371/journal.pntd.0002874. PubMed PMID:  
658 24922480; PubMed Central PMCID: PMCPMC4055548.
  - 659 6. Ermler ME, Yerukhim E, Schriewer J, Schattgen S, Traylor Z, Wespiser AR, et al. RNA  
660 Helicase Signaling Is Critical for Type I Interferon Production and Protection against Rift Valley  
661 Fever Virus during Mucosal Challenge. *Journal of Virology.* 2013;87(9):4846-60. doi:  
662 10.1128/jvi.01997-12.
  - 663 7. Albe JR, Boyles DA, Walters AW, Kujawa MR, McMillen CM, Reed DS, et al.  
664 Neutrophil and macrophage influx into the central nervous system are inflammatory components  
665 of lethal Rift Valley fever encephalitis in rats. *PLoS Pathog.* 2019;15(6):e1007833. Epub  
666 2019/06/21. doi: 10.1371/journal.ppat.1007833. PubMed PMID: 31220182; PubMed Central  
667 PMCID: PMCPMC6605717.
  - 668 8. Anyangu AS, Gould LH, Sharif SK, Nguku PM, Omolo JO, Mutonga D, et al. Risk  
669 Factors for Severe Rift Valley Fever Infection in Kenya, 2007. *The American Journal of Tropical*  
670 *Medicine and Hygiene.* 2010;83(2 Suppl):14-21. doi: 10.4269/ajtmh.2010.09-0293.
  - 671 9. LaBeaud AD, Pfeil S, Muiruri S, Dahir S, Sutherland LJ, Traylor Z, et al. Factors  
672 Associated with Severe Human Rift Valley Fever in Sangailu, Garissa County, Kenya. *PLoS*  
673 *Negl Trop Dis.* 2015;9(3):e0003548. doi: 10.1371/journal.pntd.0003548.
  - 674 10. Madani TA, Al-Mazrou YY, Al-Jeffri MH, Mishkhas AA, Al-Rabeah AM, Turkistani  
675 AM, et al. Rift Valley fever epidemic in Saudi Arabia: epidemiological, clinical, and laboratory  
676 characteristics. *Clin Infect Dis.* 2003;37(8):1084-92. Epub 2003/10/03. doi: 10.1086/378747.  
677 PubMed PMID: 14523773.
  - 678 11. Javelle E, Lesueur A, Pommier de Santi V, de Laval F, Lefebvre T, Holweck G, et al.  
679 The challenging management of Rift Valley Fever in humans: literature review of the clinical  
680 disease and algorithm proposal. *Ann Clin Microbiol Antimicrob.* 2020;19(1):4-. doi:  
681 10.1186/s12941-020-0346-5. PubMed PMID: 31969141.
  - 682 12. Rustenhoven J. A privileged brain. *Science.* 2021;374(6567):548. Epub 20211028. doi:  
683 10.1126/science.abl7122. PubMed PMID: 34709902.



- 684 13. Lampron A, Elali A, Rivest S. Innate immunity in the CNS: redefining the relationship  
685 between the CNS and Its environment. *Neuron*. 2013;78(2):214-32. Epub 2013/04/30. doi:  
686 10.1016/j.neuron.2013.04.005. PubMed PMID: 23622060.
- 687 14. Carty M, Reinert L, Paludan SR, Bowie AG. Innate antiviral signalling in the central  
688 nervous system. *Trends Immunol*. 2014;35(2):79-87. Epub 20131206. doi:  
689 10.1016/j.it.2013.10.012. PubMed PMID: 24316012.
- 690 15. Singh H, Koury J, Kaul M. Innate Immune Sensing of Viruses and Its Consequences for  
691 the Central Nervous System. *Viruses*. 2021;13(2). Epub 2021/01/28. doi: 10.3390/v13020170.  
692 PubMed PMID: 33498715; PubMed Central PMCID: PMC7912342.
- 693 16. Denizot M, Neal JW, Gasque P. Encephalitis due to emerging viruses: CNS innate  
694 immunity and potential therapeutic targets. *The Journal of infection*. 2012;65(1):1-16. Epub  
695 2012/04/10. doi: 10.1016/j.jinf.2012.03.019. PubMed PMID: 22484271.
- 696 17. Drokhlyansky E, Göz Aytürk D, Soh TK, Chrenek R, O'Loughlin E, Madore C, et al. The  
697 brain parenchyma has a type I interferon response that can limit virus spread. *Proc Natl Acad Sci*  
698 *U S A*. 2017;114(1):E95-e104. Epub 2016/12/17. doi: 10.1073/pnas.1618157114. PubMed  
699 PMID: 27980033; PubMed Central PMCID: PMC5224383.
- 700 18. Moseman EA, Blanchard AC, Nayak D, McGavern DB. T cell engagement of cross-  
701 presenting microglia protects the brain from a nasal virus infection. *Sci Immunol*. 2020;5(48).  
702 Epub 2020/06/07. doi: 10.1126/sciimmunol.abb1817. PubMed PMID: 32503876; PubMed  
703 Central PMCID: PMC7416530.
- 704 19. Sanchez JMS, DePaula-Silva AB, Doty DJ, Hanak TJ, Truong A, Libbey JE, et al. The  
705 CSF1R-Microglia Axis Has Protective Host-Specific Roles During Neurotropic Picornavirus  
706 Infection. *Frontiers in Immunology*. 2021;12(3568). doi: 10.3389/fimmu.2021.621090.
- 707 20. Funk KE, Klein RS. CSF1R antagonism limits local restimulation of antiviral CD8+ T  
708 cells during viral encephalitis. *Journal of neuroinflammation*. 2019;16(1):22. doi:  
709 10.1186/s12974-019-1397-4.
- 710 21. Mangale V, Syage AR, Ekiz HA, Skinner DD, Cheng Y, Stone CL, et al. Microglia  
711 influence host defense, disease, and repair following murine coronavirus infection of the central  
712 nervous system. *Glia*. 2020;68(11):2345-60. Epub 20200525. doi: 10.1002/glia.23844. PubMed  
713 PMID: 32449994; PubMed Central PMCID: PMC7280614.
- 714 22. Chhatbar C, Detje CN, Grabski E, Borst K, Spanier J, Ghita L, et al. Type I Interferon  
715 Receptor Signaling of Neurons and Astrocytes Regulates Microglia Activation during Viral  
716 Encephalitis. *Cell Rep*. 2018;25(1):118-29.e4. Epub 2018/10/04. doi:  
717 10.1016/j.celrep.2018.09.003. PubMed PMID: 30282022; PubMed Central PMCID:  
718 PMC7103936.
- 719 23. Tsai TT, Chen CL, Lin YS, Chang CP, Tsai CC, Cheng YL, et al. Microglia retard  
720 dengue virus-induced acute viral encephalitis. *Sci Rep*. 2016;6:27670. Epub 20160609. doi:  
721 10.1038/srep27670. PubMed PMID: 27279150; PubMed Central PMCID: PMC4899773.
- 722 24. Tansey MG, Goldberg MS. Neuroinflammation in Parkinson's disease: its role in  
723 neuronal death and implications for therapeutic intervention. *Neurobiol Dis*. 2010;37(3):510-8.  
724 Epub 20091110. doi: 10.1016/j.nbd.2009.11.004. PubMed PMID: 19913097; PubMed Central  
725 PMCID: PMC2823829.
- 726 25. Zhang G, Wang Z, Hu H, Zhao M, Sun L. Microglia in Alzheimer's Disease: A Target for  
727 Therapeutic Intervention. *Front Cell Neurosci*. 2021;15:749587. Epub 20211124. doi:  
728 10.3389/fncel.2021.749587. PubMed PMID: 34899188; PubMed Central PMCID:  
729 PMC8651709.

- 730 26. Dodd KA, McElroy AK, Jones ME, Nichol ST, Spiropoulou CF. Rift Valley fever virus  
731 clearance and protection from neurologic disease are dependent on CD4+ T cell and virus-  
732 specific antibody responses. *J Virol.* 2013;87(11):6161-71. Epub 20130327. doi:  
733 10.1128/jvi.00337-13. PubMed PMID: 23536675; PubMed Central PMCID: PMCPMC3648110.
- 734 27. Harmon JR, Spengler JR, Coleman-McCray JD, Nichol ST, Spiropoulou CF, McElroy  
735 AK. CD4 T Cells, CD8 T Cells, and Monocytes Coordinate To Prevent Rift Valley Fever Virus  
736 Encephalitis. *J Virol.* 2018;92(24). Epub 20181127. doi: 10.1128/jvi.01270-18. PubMed PMID:  
737 30258000; PubMed Central PMCID: PMCPMC6258944.
- 738 28. Daffis S, Samuel MA, Suthar MS, Gale M, Jr., Diamond MS. Toll-like receptor 3 has a  
739 protective role against West Nile virus infection. *J Virol.* 2008;82(21):10349-58. Epub  
740 2008/08/22. doi: 10.1128/jvi.00935-08. PubMed PMID: 18715906; PubMed Central PMCID:  
741 PMCPMC2573187.
- 742 29. Town T, Bai F, Wang T, Kaplan AT, Qian F, Montgomery RR, et al. Toll-like receptor 7  
743 mitigates lethal West Nile encephalitis via interleukin 23-dependent immune cell infiltration and  
744 homing. *Immunity.* 2009;30(2):242-53. Epub 2009/02/10. doi: 10.1016/j.immuni.2008.11.012.  
745 PubMed PMID: 19200759; PubMed Central PMCID: PMCPMC2707901.
- 746 30. Suthar MS, Ma DY, Thomas S, Lund JM, Zhang N, Daffis S, et al. IPS-1 is essential for  
747 the control of West Nile virus infection and immunity. *PLoS Pathog.* 2010;6(2):e1000757. Epub  
748 2010/02/09. doi: 10.1371/journal.ppat.1000757. PubMed PMID: 20140199; PubMed Central  
749 PMCID: PMCPMC2816698.
- 750 31. Hise AG, Traylor Z, Hall NB, Sutherland LJ, Dahir S, Ermler ME, et al. Association of  
751 Symptoms and Severity of Rift Valley Fever with Genetic Polymorphisms in Human Innate  
752 Immune Pathways. *PLoS Negl Trop Dis.* 2015;9(3):e0003584. doi:  
753 10.1371/journal.pntd.0003584.
- 754 32. Roberts KK, Hill TE, Davis MN, Holbrook MR, Freiberg AN. Cytokine response in  
755 mouse bone marrow derived macrophages after infection with pathogenic and non-pathogenic  
756 Rift Valley fever virus. *J Gen Virol.* 2015;96(Pt 7):1651-63. Epub 2015/03/12. doi:  
757 10.1099/vir.0.000119. PubMed PMID: 25759029; PubMed Central PMCID: PMCPMC4635452.
- 758 33. Artegiani B, Lyubimova A, Muraro M, van Es JH, van Oudenaarden A, Clevers H. A  
759 Single-Cell RNA Sequencing Study Reveals Cellular and Molecular Dynamics of the  
760 Hippocampal Neurogenic Niche. *Cell Rep.* 2017;21(11):3271-84. doi:  
761 10.1016/j.celrep.2017.11.050. PubMed PMID: 29241552.
- 762 34. Cougnoux A, Yerger JC, Fellmeth M, Serra-Vinardell J, Martin K, Navid F, et al. Single  
763 Cell Transcriptome Analysis of Niemann-Pick Disease, Type C1 Cerebella. *Int J Mol Sci.*  
764 2020;21(15). Epub 20200728. doi: 10.3390/ijms21155368. PubMed PMID: 32731618; PubMed  
765 Central PMCID: PMCPMC7432835.
- 766 35. Vanlandewijck M, He L, Mäe MA, Andrae J, Ando K, Del Gaudio F, et al. A molecular  
767 atlas of cell types and zonation in the brain vasculature. *Nature.* 2018;554(7693):475-80. Epub  
768 20180214. doi: 10.1038/nature25739. PubMed PMID: 29443965.
- 769 36. Hammond TR, Dufort C, Dissing-Olesen L, Giera S, Young A, Wysoker A, et al. Single-  
770 Cell RNA Sequencing of Microglia throughout the Mouse Lifespan and in the Injured Brain  
771 Reveals Complex Cell-State Changes. *Immunity.* 2019;50(1):253-71.e6. Epub 20181121. doi:  
772 10.1016/j.immuni.2018.11.004. PubMed PMID: 30471926; PubMed Central PMCID:  
773 PMCPMC6655561.
- 774 37. Morimoto K, Nakajima K. Role of the Immune System in the Development of the Central  
775 Nervous System. *Frontiers in Neuroscience.* 2019;13(916). doi: 10.3389/fnins.2019.00916.

- 776 38. Goldmann T, Wieghofer P, Jordão MJ, Prutek F, Hagemeyer N, Frenzel K, et al. Origin,  
777 fate and dynamics of macrophages at central nervous system interfaces. *Nat Immunol.*  
778 2016;17(7):797-805. Epub 2016/05/03. doi: 10.1038/ni.3423. PubMed PMID: 27135602;  
779 PubMed Central PMCID: PMC4968048.
- 780 39. Masuda T, Tsuda M, Yoshinaga R, Tozaki-Saitoh H, Ozato K, Tamura T, et al. IRF8 is a  
781 critical transcription factor for transforming microglia into a reactive phenotype. *Cell Rep.*  
782 2012;1(4):334-40. Epub 2012/07/27. doi: 10.1016/j.celrep.2012.02.014. PubMed PMID:  
783 22832225; PubMed Central PMCID: PMC4158926.
- 784 40. Masuda T, Iwamoto S, Mikuriya S, Tozaki-Saitoh H, Tamura T, Tsuda M, et al.  
785 Transcription factor IRF1 is responsible for IRF8-mediated IL-1 $\beta$  expression in reactive  
786 microglia. *J Pharmacol Sci.* 2015;128(4):216-20. Epub 2015/09/01. doi:  
787 10.1016/j.jphs.2015.08.002. PubMed PMID: 26318672.
- 788 41. Wierońska JM, Cieřlik P, Kalinowski L. Nitric Oxide-Dependent Pathways as Critical  
789 Factors in the Consequences and Recovery after Brain Ischemic Hypoxia. *Biomolecules.*  
790 2021;11(8). Epub 2021/07/26. doi: 10.3390/biom11081097. PubMed PMID: 34439764; PubMed  
791 Central PMCID: PMC8392725.
- 792 42. Voskoboinik I, Whisstock JC, Trapani JA. Perforin and granzymes: function, dysfunction  
793 and human pathology. *Nature reviews Immunology.* 2015;15(6):388-400. doi: 10.1038/nri3839.  
794 PubMed PMID: 25998963.
- 795 43. Shrestha B, Samuel MA, Diamond MS. CD8+ T cells require perforin to clear West Nile  
796 virus from infected neurons. *J Virol.* 2006;80(1):119-29. doi: 10.1128/jvi.80.1.119-129.2006.  
797 PubMed PMID: 16352536; PubMed Central PMCID: PMC1317548.
- 798 44. Shi F-D, Ransohoff RM. Nature killer cells in the central nervous system. *Natural Killer*  
799 *Cells.* 2010:373-83. Epub 2010/01/29. doi: 10.1016/B978-0-12-370454-2.00028-4. PubMed  
800 PMID: PMC7150147.
- 801 45. Yao Y, Strauss-Albee DM, Zhou JQ, Malawista A, Garcia MN, Murray KO, et al. The  
802 natural killer cell response to West Nile virus in young and old individuals with or without a  
803 prior history of infection. *PLOS ONE.* 2017;12(2):e0172625. doi:  
804 10.1371/journal.pone.0172625.
- 805 46. Choi YH, Lim EJ, Kim SW, Moon YW, Park KS, An HJ. IL-27 enhances IL-15/IL-18-  
806 mediated activation of human natural killer cells. *J Immunother Cancer.* 2019;7(1):168. Epub  
807 2019/07/05. doi: 10.1186/s40425-019-0652-7. PubMed PMID: 31277710; PubMed Central  
808 PMCID: PMC6612093.
- 809 47. Ochayon DE, Waggoner SN. The Effect of Unconventional Cytokine Combinations on  
810 NK-Cell Responses to Viral Infection. *Frontiers in Immunology.* 2021;12(775). doi:  
811 10.3389/fimmu.2021.645850.
- 812 48. Nakanishi K. Unique Action of Interleukin-18 on T Cells and Other Immune Cells.  
813 *Frontiers in Immunology.* 2018;9(763). doi: 10.3389/fimmu.2018.00763.
- 814 49. Ziblat A, Domaica CI, Spallanzani RG, Iraolagoitia XL, Rossi LE, Avila DE, et al. IL-27  
815 stimulates human NK-cell effector functions and primes NK cells for IL-18 responsiveness.  
816 *European journal of immunology.* 2015;45(1):192-202. Epub 2014/12/02. doi:  
817 10.1002/eji.201444699. PubMed PMID: 25308526.
- 818 50. Smith DR, Steele KE, Shamblin J, Honko A, Johnson J, Reed C, et al. The pathogenesis  
819 of Rift Valley fever virus in the mouse model. *Virology.* 2010;407(2):256-67. Epub 2010/09/21.  
820 doi: 10.1016/j.virol.2010.08.016. PubMed PMID: 20850165.

- 821 51. Chen Z, Zhong D, Li G. The role of microglia in viral encephalitis: a review. *Journal of*  
822 *neuroinflammation*. 2019;16(1):76. Epub 2019/04/11. doi: 10.1186/s12974-019-1443-2. PubMed  
823 PMID: 30967139; PubMed Central PMCID: PMC6454758.
- 824 52. Stonedahl S, Clarke P, Tyler KL. The Role of Microglia during West Nile Virus Infection  
825 of the Central Nervous System. *Vaccines (Basel)*. 2020;8(3). Epub 2020/09/03. doi:  
826 10.3390/vaccines8030485. PubMed PMID: 32872152; PubMed Central PMCID:  
827 PMC67563127.
- 828 53. Pichlmair A, Lassnig C, Eberle CA, Gónna MW, Baumann CL, Burkard TR, et al. IFIT1  
829 is an antiviral protein that recognizes 5'-triphosphate RNA. *Nat Immunol*. 2011;12(7):624-30.  
830 Epub 2011/06/07. doi: 10.1038/ni.2048. PubMed PMID: 21642987.
- 831 54. Neil SJ, Zang T, Bieniasz PD. Tetherin inhibits retrovirus release and is antagonized by  
832 HIV-1 Vpu. *Nature*. 2008;451(7177):425-30. Epub 2008/01/18. doi: 10.1038/nature06553.  
833 PubMed PMID: 18200009.
- 834 55. Radoshitzky SR, Dong L, Chi X, Clester JC, Retterer C, Spurgers K, et al. Infectious  
835 Lassa virus, but not filoviruses, is restricted by BST-2/tetherin. *J Virol*. 2010;84(20):10569-80.  
836 Epub 2010/08/06. doi: 10.1128/jvi.00103-10. PubMed PMID: 20686043; PubMed Central  
837 PMCID: PMC2950602.
- 838 56. Lucas TM, Richner JM, Diamond MS, Perlman S. The Interferon-Stimulated Gene  
839 *Irf2712a* Restricts West Nile Virus Infection and Pathogenesis in a Cell-Type- and  
840 Region-Specific Manner. *Journal of Virology*. 2016;90(5):2600-15. doi: doi:10.1128/JVI.02463-  
841 15.
- 842 57. Lee MS, Kim B, Oh GT, Kim Y-J. OASL1 inhibits translation of the type I interferon-  
843 regulating transcription factor IRF7. *Nature Immunology*. 2013;14(4):346-55. doi:  
844 10.1038/ni.2535.
- 845 58. Zhao J, Vijay R, Zhao J, Gale M, Jr., Diamond MS, Perlman S. MAVS Expressed by  
846 Hematopoietic Cells Is Critical for Control of West Nile Virus Infection and Pathogenesis. *J*  
847 *Virol*. 2016;90(16):7098-108. Epub 20160727. doi: 10.1128/jvi.00707-16. PubMed PMID:  
848 27226371; PubMed Central PMCID: PMC4984631.
- 849 59. O'Keefe GM, Nguyen VT, Ping Tang L, Benveniste EN. IFN- $\gamma$  Regulation of Class II  
850 Transactivator Promoter IV in Macrophages and Microglia: Involvement of the Suppressors of  
851 Cytokine Signaling-1 Protein. *The Journal of Immunology*. 2001;166(4):2260-9. doi:  
852 10.4049/jimmunol.166.4.2260.
- 853 60. Harmon B, Schudel BR, Maar D, Kozina C, Ikegami T, Tseng CT, et al. Rift Valley fever  
854 virus strain MP-12 enters mammalian host cells via caveola-mediated endocytosis. *J Virol*.  
855 2012;86(23):12954-70. Epub 20120919. doi: 10.1128/jvi.02242-12. PubMed PMID: 22993156;  
856 PubMed Central PMCID: PMC3497621.
- 857 61. Harmon B, Bird SW, Schudel BR, Hatch AV, Rasley A, Negrete OA. A Genome-Wide  
858 RNA Interference Screen Identifies a Role for Wnt/ $\beta$ -Catenin Signaling during Rift Valley Fever  
859 Virus Infection. *J Virol*. 2016;90(16):7084-97. Epub 20160727. doi: 10.1128/jvi.00543-16.  
860 PubMed PMID: 27226375; PubMed Central PMCID: PMC4984662.
- 861 62. Rasley A, Anguita J, Marriott I. *Borrelia burgdorferi* induces inflammatory mediator  
862 production by murine microglia. *Journal of neuroimmunology*. 2002;130(1):22-31. doi:  
863 [https://doi.org/10.1016/S0165-5728\(02\)00187-X](https://doi.org/10.1016/S0165-5728(02)00187-X).
- 864 63. Rasley A, Bost KL, Olson JK, Miller SD, Marriott I. Expression of functional NK-1  
865 receptors in murine microglia. *Glia*. 2002;37(3):258-67. doi: <https://doi.org/10.1002/glia.10034>.

- 866 64. Martin E, El-Behi M, Fontaine B, Delarasse C. Analysis of Microglia and Monocyte-  
867 derived Macrophages from the Central Nervous System by Flow Cytometry. *Journal of*  
868 *visualized experiments : JoVE*. 2017;(124):55781. doi: 10.3791/55781. PubMed PMID:  
869 28671658.
- 870 65. Bird BH, Bawiec DA, Ksiazek TG, Shoemaker TR, Nichol ST. Highly sensitive and  
871 broadly reactive quantitative reverse transcription-PCR assay for high-throughput detection of  
872 Rift Valley fever virus. *J Clin Microbiol*. 2007;45(11):3506-13. Epub 2007/09/07. doi:  
873 10.1128/jcm.00936-07. PubMed PMID: 17804663; PubMed Central PMCID:  
874 PMCPMC2168471.
- 875 66. Dobin A, Davis CA, Schlesinger F, Drenkow J, Zaleski C, Jha S, et al. STAR: ultrafast  
876 universal RNA-seq aligner. *Bioinformatics*. 2013;29(1):15-21. Epub 20121025. doi:  
877 10.1093/bioinformatics/bts635. PubMed PMID: 23104886; PubMed Central PMCID:  
878 PMCPMC3530905.
- 879 67. Liao Y, Smyth GK, Shi W. featureCounts: an efficient general purpose program for  
880 assigning sequence reads to genomic features. *Bioinformatics*. 2014;30(7):923-30. Epub  
881 20131113. doi: 10.1093/bioinformatics/btt656. PubMed PMID: 24227677.
- 882 68. Risso D, Ngai J, Speed TP, Dudoit S. Normalization of RNA-seq data using factor  
883 analysis of control genes or samples. *Nature biotechnology*. 2014;32(9):896-902. Epub  
884 2014/08/24. doi: 10.1038/nbt.2931. PubMed PMID: 25150836.
- 885 69. Robinson MD, McCarthy DJ, Smyth GK. edgeR: a Bioconductor package for differential  
886 expression analysis of digital gene expression data. *Bioinformatics (Oxford, England)*.  
887 2010;26(1):139-40. Epub 2009/11/11. doi: 10.1093/bioinformatics/btp616. PubMed PMID:  
888 19910308.
- 889 70. Chen J, Bardes EE, Aronow BJ, Jegga AG. ToppGene Suite for gene list enrichment  
890 analysis and candidate gene prioritization. *Nucleic Acids Res*. 2009;37(Web Server  
891 issue):W305-W11. Epub 2009/05/22. doi: 10.1093/nar/gkp427. PubMed PMID: 19465376.
- 892 71. Brewer GJ, Torricelli JR. Isolation and culture of adult neurons and neurospheres. *Nature*  
893 *Protocols*. 2007;2(6):1490-8. doi: 10.1038/nprot.2007.207.
- 894 72. Stuart T, Butler A, Hoffman P, Hafemeister C, Papalexi E, Mauck WM, 3rd, et al.  
895 Comprehensive Integration of Single-Cell Data. *Cell*. 2019;177(7):1888-902.e21. Epub  
896 2019/06/11. doi: 10.1016/j.cell.2019.05.031. PubMed PMID: 31178118; PubMed Central  
897 PMCID: PMC6687398.
- 898 73. Hum NR, Sebastian A, Gilmore SF, He W, Martin KA, Hinckley A, et al. Comparative  
899 Molecular Analysis of Cancer Behavior Cultured In Vitro, In Vivo, and Ex Vivo. *Cancers*  
900 (Basel). 2020;12(3). Epub 20200314. doi: 10.3390/cancers12030690. PubMed PMID: 32183351;  
901 PubMed Central PMCID: PMC67140030.
- 902  
903

904 **Figure 1**  
905

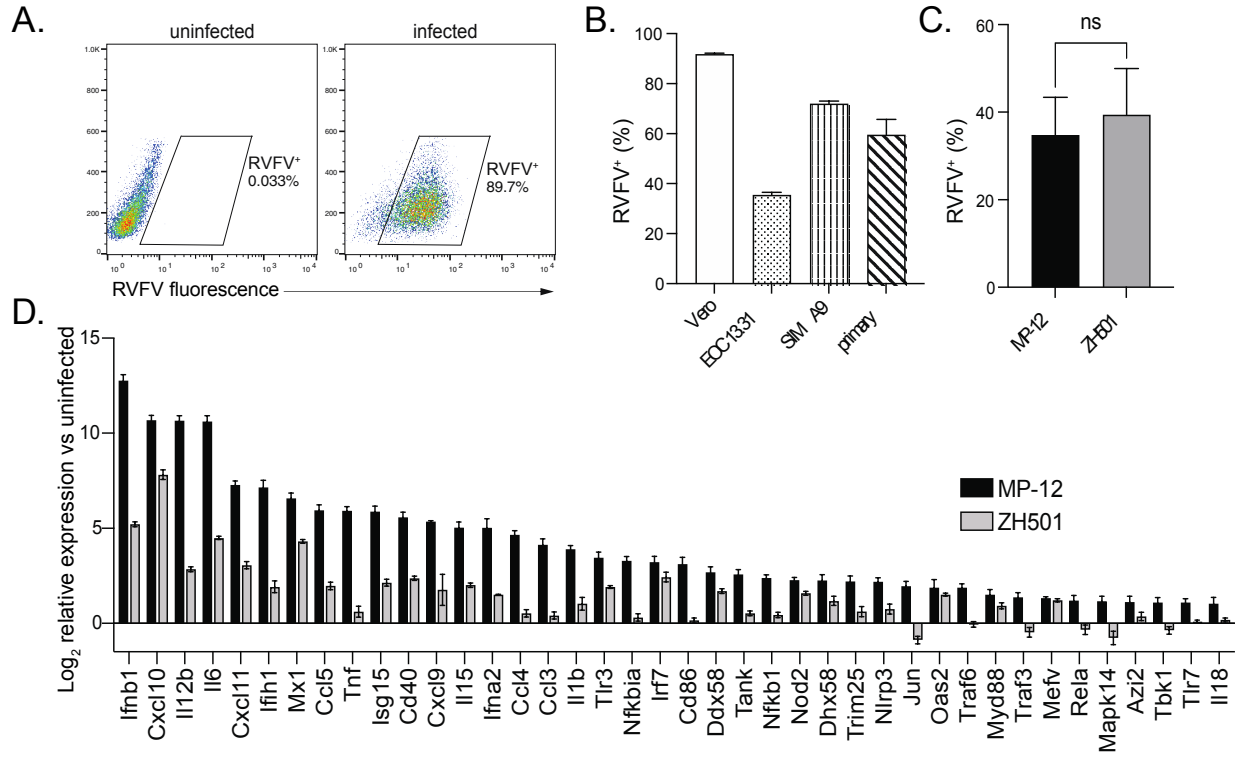

906  
907  
908

909 **Figure 2**

A.

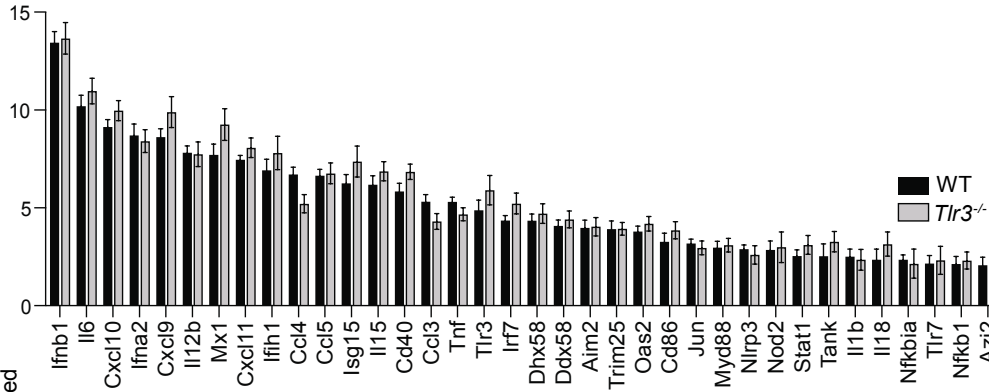

B.

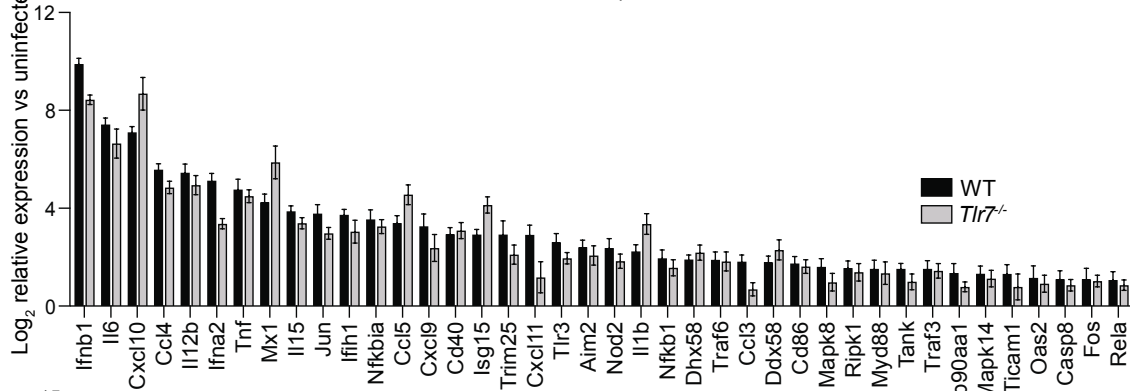

C.

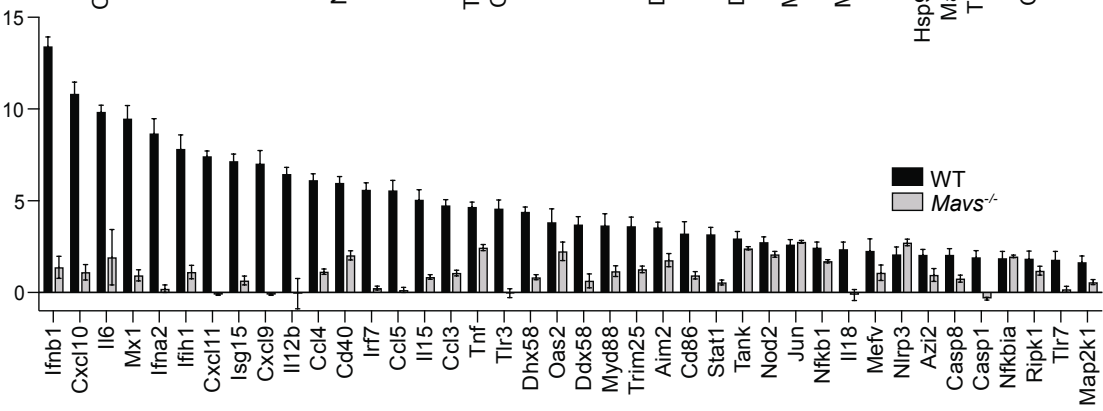

910

911

912

913 **Figure 3**  
914

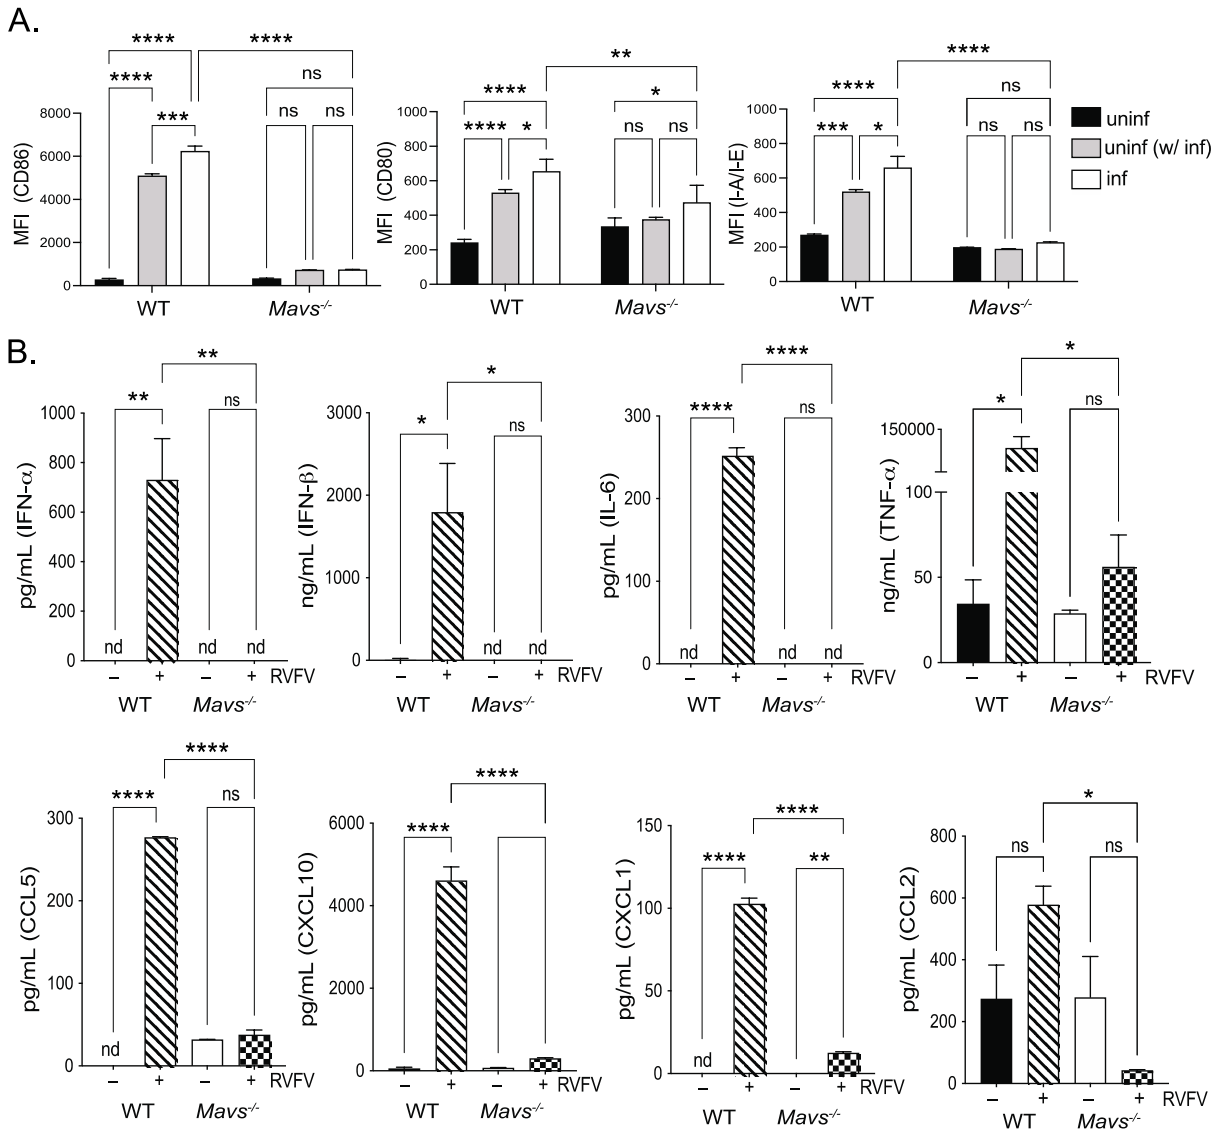

915  
916



917 **Figure 4**  
918

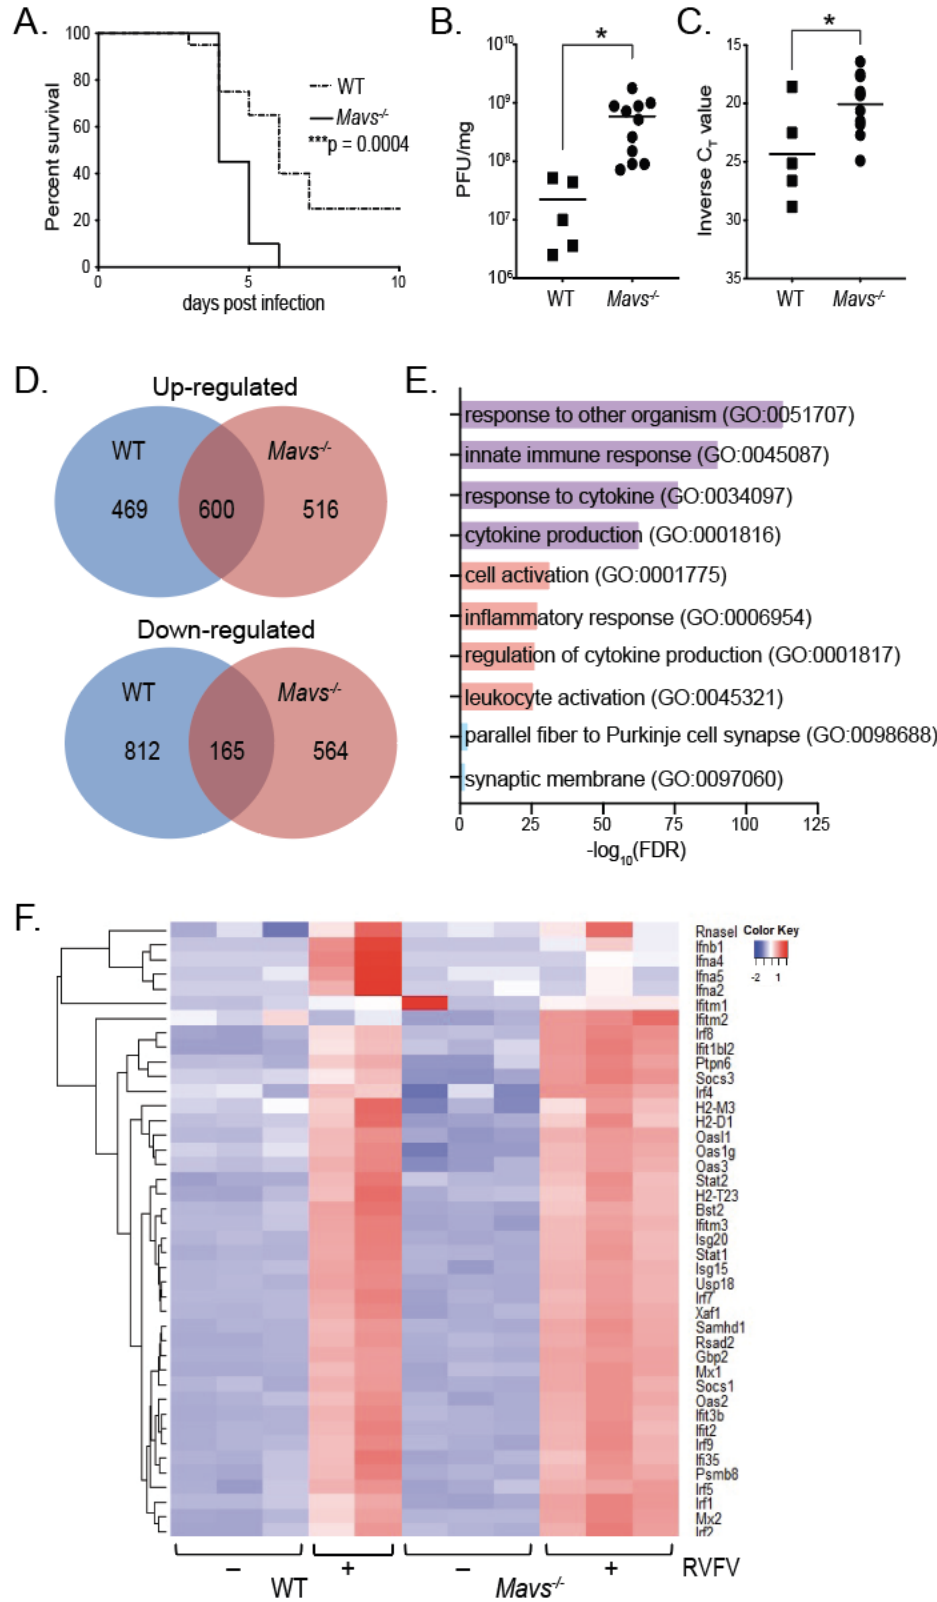

919  
920

921 **Figure 5**

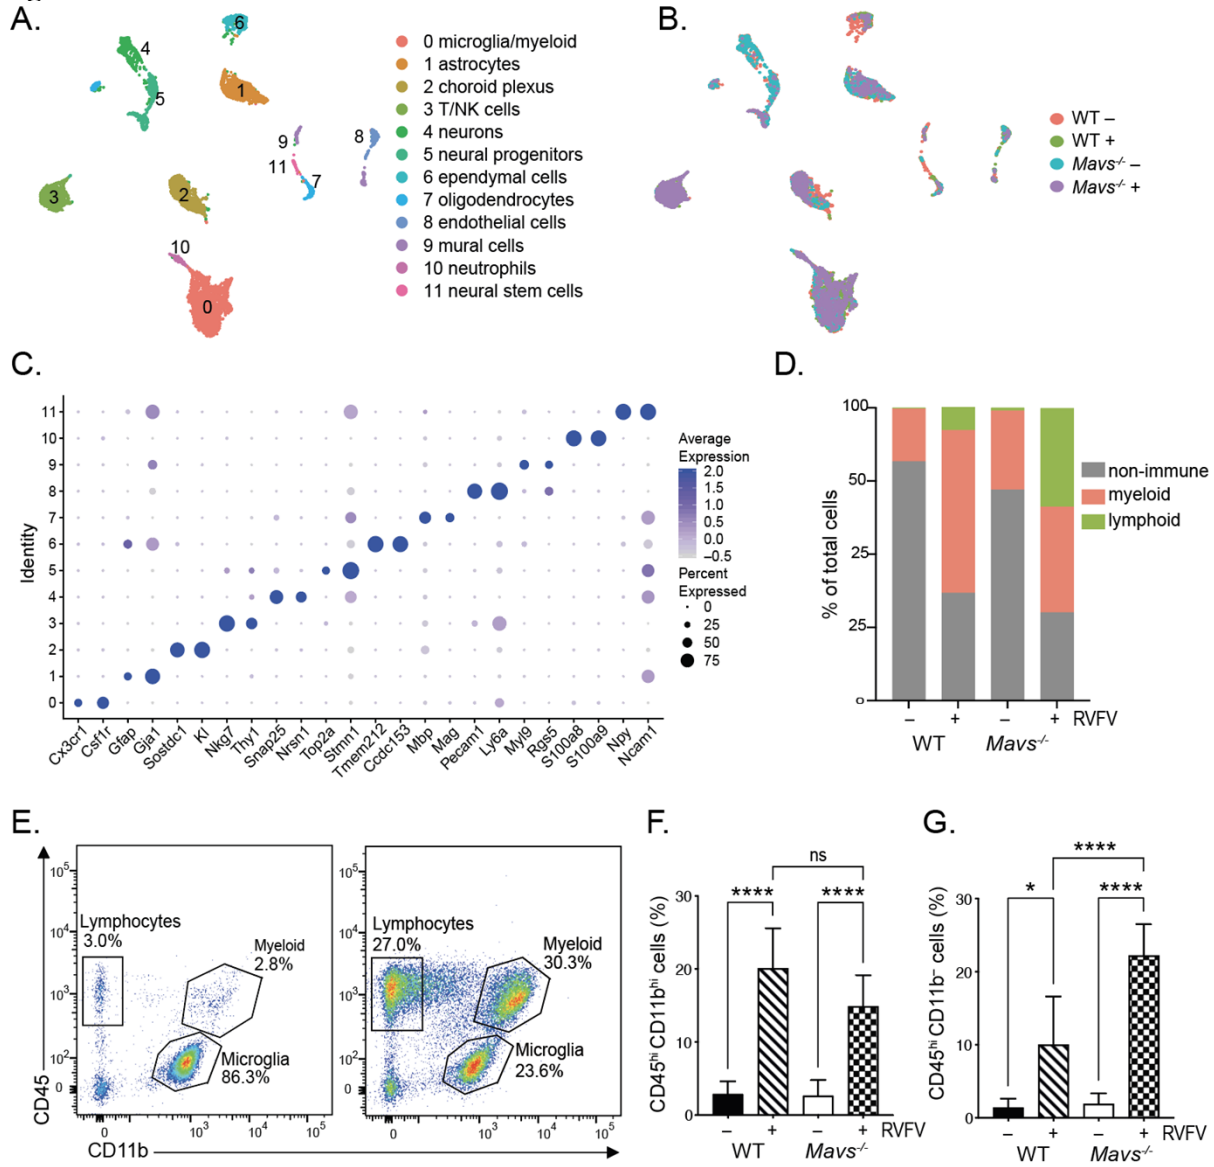

922  
923

924 **Figure 6**  
925

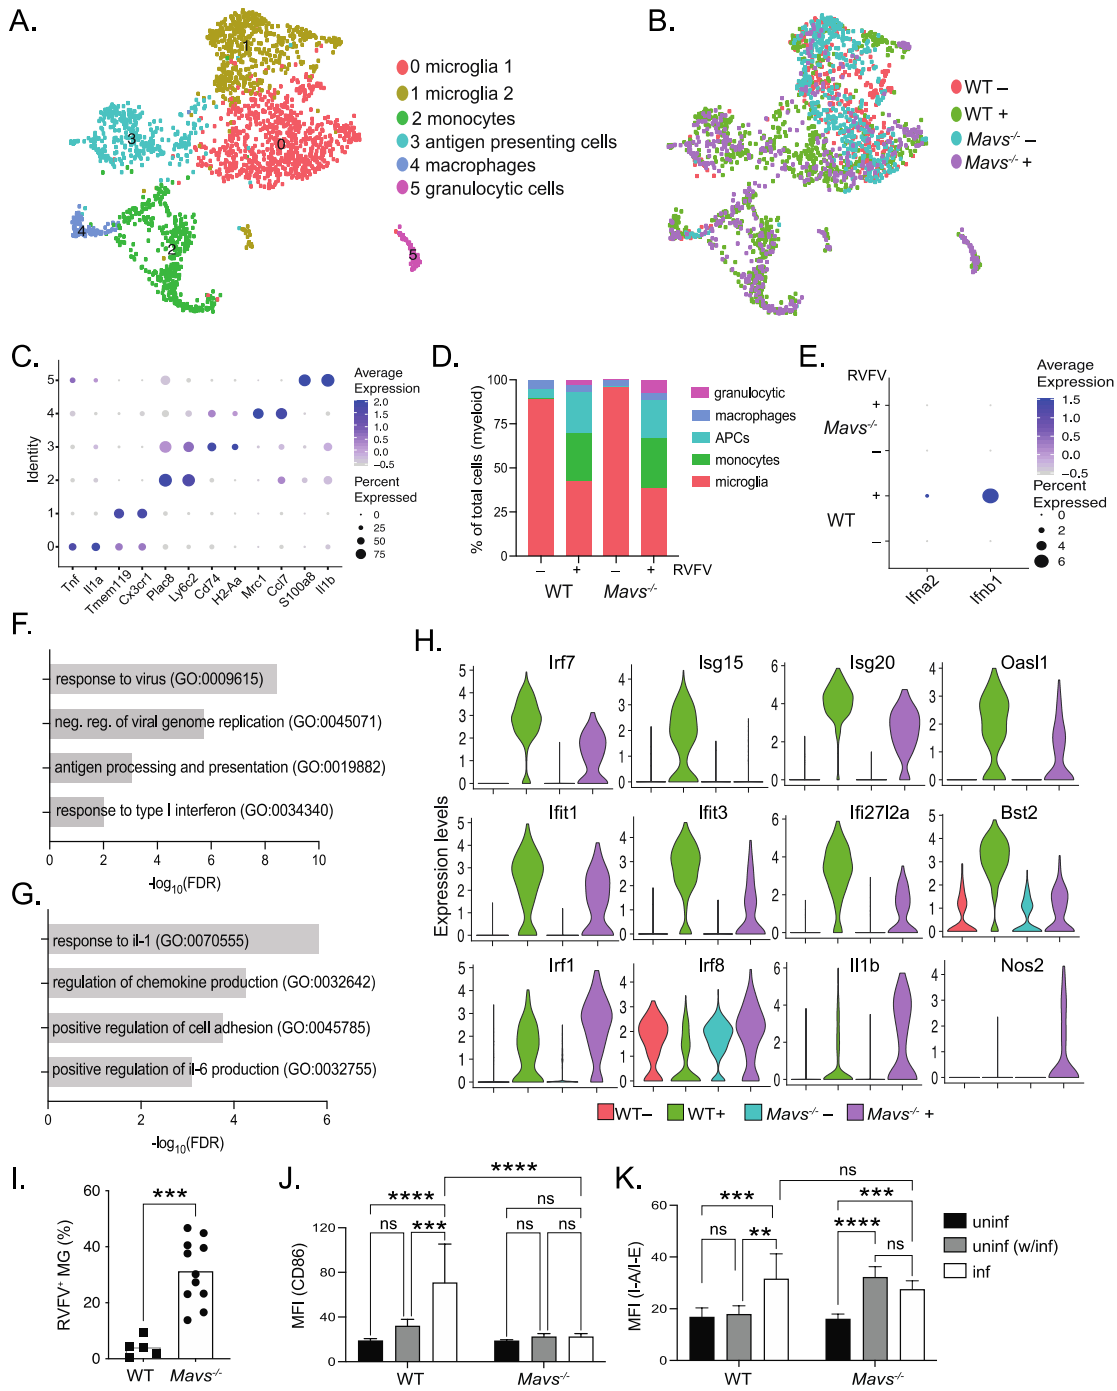

926  
927

928 **Figure 7**  
929

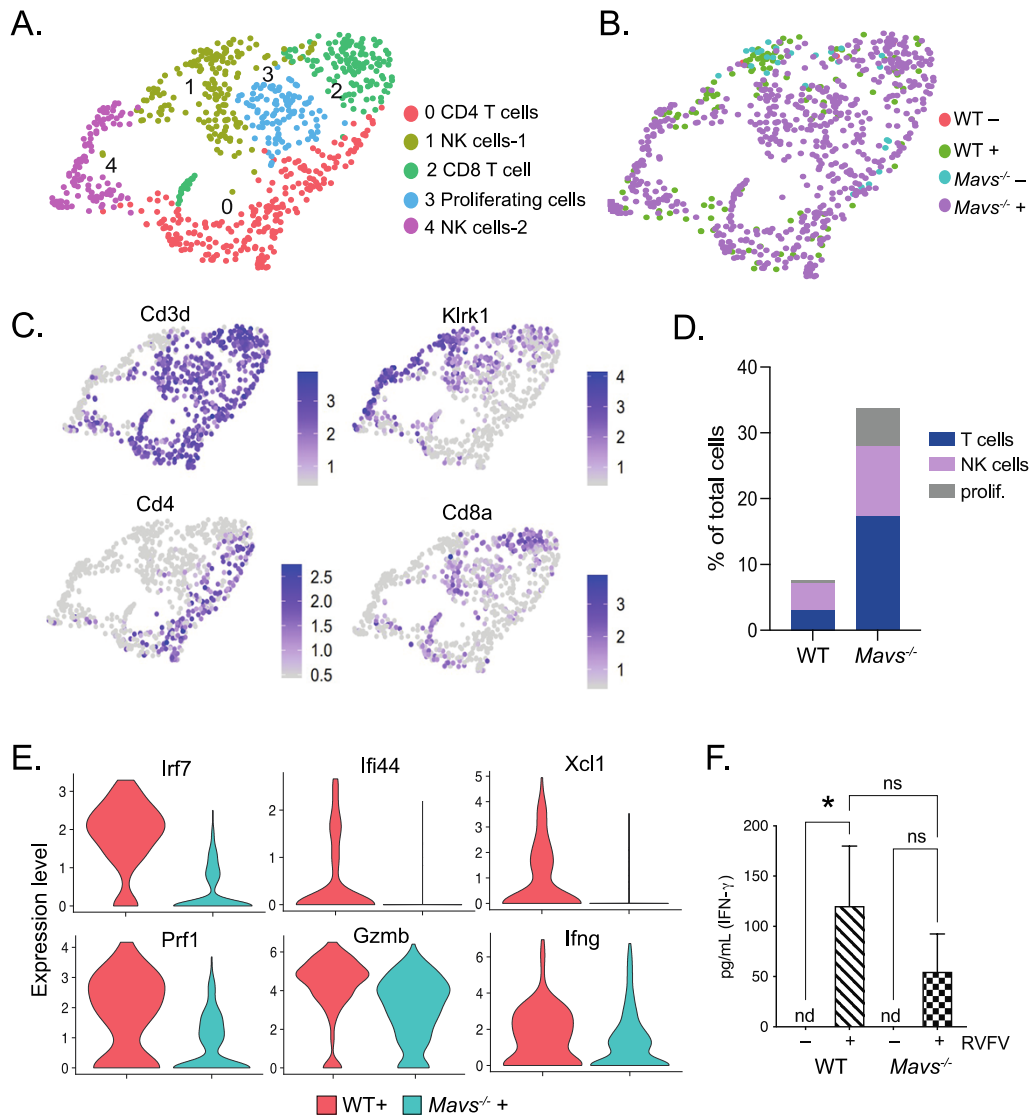

930  
931  
932

933 **Figure S1**

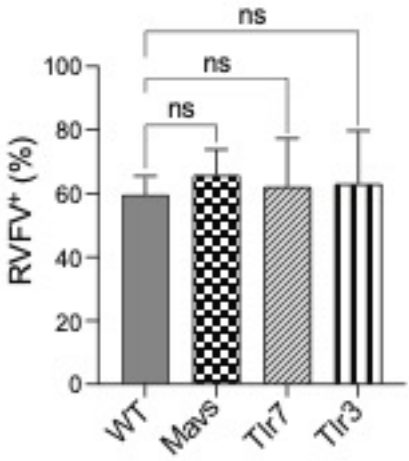

934  
935  
936  
937

**Figure S2**

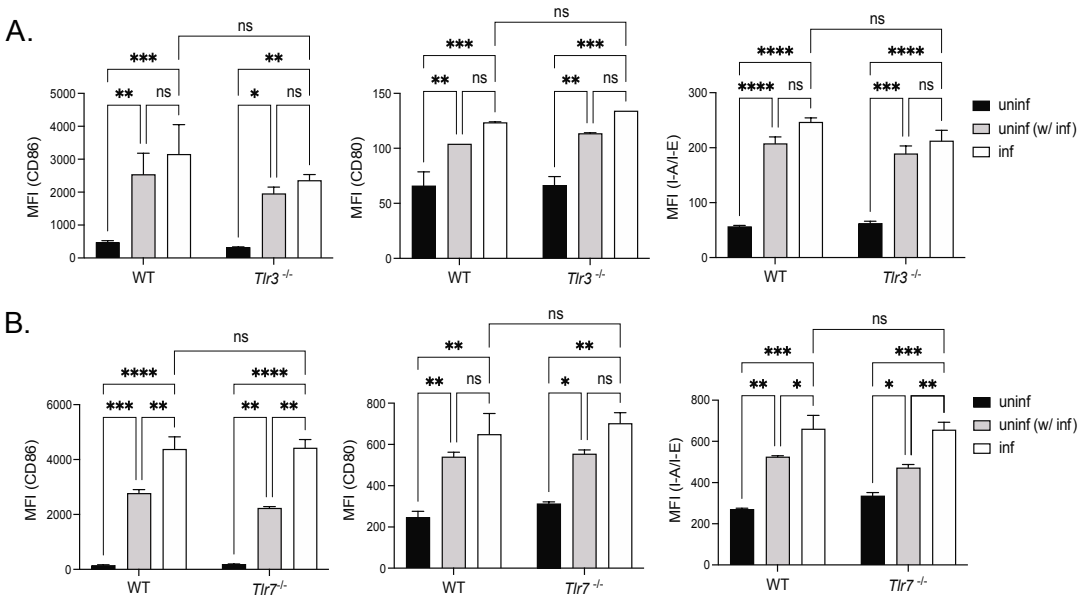

938  
939  
940

**Figure S3**

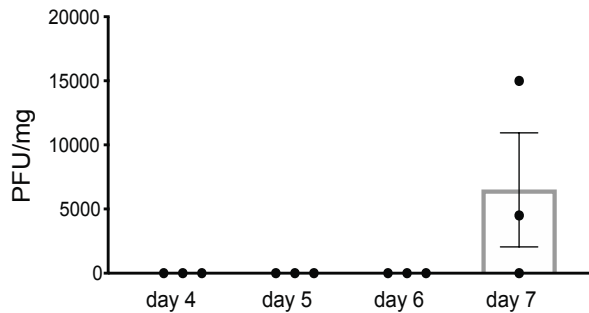

941  
942

943

944 **Figure S4**

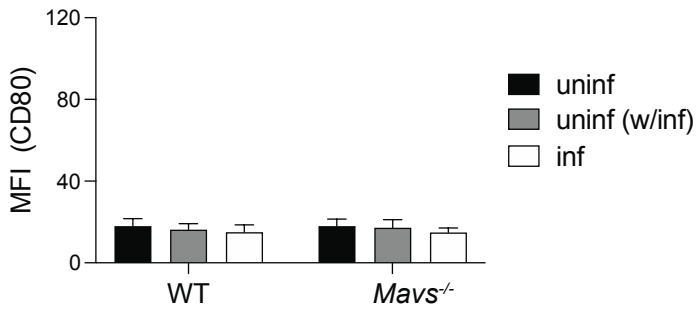

945

946

947 **Figure S5**

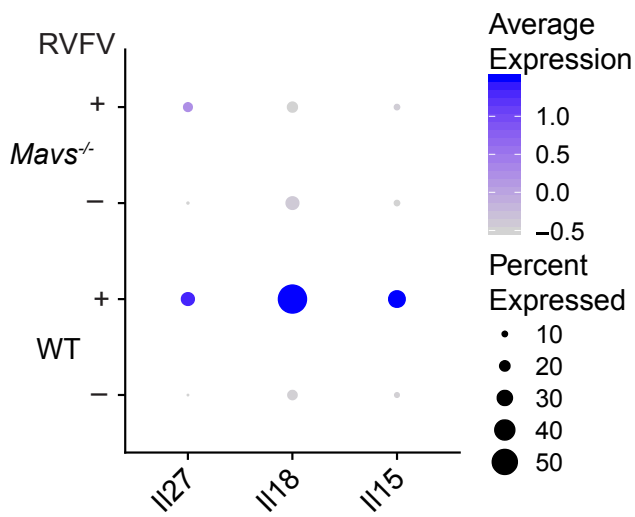

948

949

950

951 **Figure 1. RVFV infects microglia.** Microglia cell lines EOC 13.31 and SIM A9 and primary  
952 microglia derived from the brains of neonatal mice, along with Vero positive control cells, were  
953 infected with RVFV MP-12. The percentage of cells positive for RVFV was assessed by flow  
954 cytometry. Representative plots of Vero cell infection analysis (A). RVFV infection rate for all  
955 cell types (B). Primary microglia derived from wildtype (WT) mice were infected with RVFV  
956 MP-12 or ZH501 and the percentage of cells positive for RVFV was assessed by flow cytometry  
957 (C). The relative expression of 40 antiviral response genes with the highest fold change in  
958 infected versus uninfected cells (D). Data in (B-C) are shown as the mean +/- SD. Data in (D) are  
959 shown as the mean log<sub>2</sub> fold change in infected versus uninfected cells +/- SEM.

961 **Figure 2. Microglial response to RVFV infection is dependent upon MAVS and**  
962 **independent of TLR7 and TLR3.** Primary microglia derived from WT or *Tlr3*<sup>-/-</sup> (A), *Tlr7*<sup>-/-</sup> (B)  
963 or *Mavs*<sup>-/-</sup> (C) were infected with RVFV MP-12. The relative expression of 40 antiviral response  
964 genes with the highest fold change in WT cells are shown as the mean log<sub>2</sub> fold change in  
965 infected versus uninfected cells, +/- SEM.

967 **Figure 3. Microglia respond to RVFV infection in vitro by cytokine secretion and**  
968 **upregulation of activation markers.** Microglia derived from WT or *Mavs*<sup>-/-</sup> mice were infected  
969 with RVFV MP-12 and at 18-24 h post-infection, cells and cellular supernatants were harvested  
970 for flow cytometry and multiplex cytokine analysis, respectively. The expression levels of the  
971 indicated activation markers were assessed on uninfected cells (black bars), uninfected cells in  
972 culture with infected cells (uninf (w/ inf), gray bars), and infected cells (inf, white bars) and  
973 shown as the mean fluorescence intensity of the indicated activation markers (A). Cytokine  
974 levels in cellular supernatants (B). Data are shown as the mean +/- SD, nd = not detected and  
975 was denoted as zero \*p < 0.05, \*\*p < 0.01, \*\*\*p < 0.001, \*\*\*\*p < 0.0001

977 **Figure 4. *Mavs*<sup>-/-</sup> mice are more susceptible to intranasal RVFV infection and display**  
978 **increased viral burden and immune gene expression in the brain.** WT or *Mavs*<sup>-/-</sup> mice were  
979 infected intranasally with 1000 PFU RVFV ZH501 (A), or 5x10<sup>5</sup> PFU RVFV MP-12 (B-E).  
980 Morbidity and mortality were assessed daily, and percent survival is depicted in (A). On day 7  
981 post infection (B-E), brains were processed for viral quantitation and RNA extraction. Viral  
982 quantitation (B). Genes differentially expressed between uninfected and infected brains (C).  
983 Functional enrichment of differentially expressed genes (D). Ontologies that were enriched in  
984 both WT and *Mavs*<sup>-/-</sup> infected brains are highlighted in purple. Pathways enriched only in *Mavs*<sup>-/-</sup>  
985 or WT infected brains are highlighted in red and blue, respectively. Heatmap of IFN α/β  
986 signaling genes (E). \*p < 0.05, \*\*\*p < 0.001

987  
988 **Figure 5. Single cell RNA sequencing reveals shifts in cell populations and immune**  
989 **infiltration in the brain following RVFV infection.** UMAP plots depicting cell clusters derived  
990 from WT and *Mavs*<sup>-/-</sup> brains, +/- RVFV infection. Cell types (A) or conditions (B) are color  
991 coded. Gene markers for specific cell types (C). The distribution of cell types within brains of  
992 each condition (D). Flow cytometry: Representative plots of CD11b vs CD45 and the gates  
993 defining microglia, lymphocytes, and myeloid cells are shown for uninfected (left panel) and  
994 infected brains (right panel) (E). The percent myeloid cells (CD11b<sup>hi</sup> CD45<sup>hi</sup>), and lymphocytes  
995 (CD11b<sup>-</sup> CD45<sup>hi</sup>) (F) and (G), respectively. Data in (F) and (G) are shown as the mean +/- SD.  
996 \*p < 0.05, \*\*\*p < 0.001, \*\*\*\*p < 0.0001

997

998 **Figure 6. Microglia from *Mavs*<sup>-/-</sup> brains have defective response to RVFV infection**

999 UMAP plots depicting cell clusters of myeloid lineage cells derived from WT and *Mavs*<sup>-/-</sup> brains,  
1000 +/- RVFV infection. Cell types (A) or conditions (B) are color coded. Gene markers for specific  
1001 cell types (C). The distribution of myeloid lineage cell types within brains of each condition (D).  
1002 Expression of type I IFNs within microglia (clusters 0 and 1) (E). Gene ontology (GO)  
1003 enrichment analysis showing enriched in WT vs *Mavs*<sup>-/-</sup>, or *Mavs*<sup>-/-</sup> vs WT microglia (clusters 0  
1004 and 1) from infected brains are shown in (F) and (G), respectively. Violin plots depicting the  
1005 relative expression of selected genes within microglia (clusters 0 and 1) are shown in (H). Flow  
1006 cytometry: microglia were defined as CD11b<sup>int</sup> CD45<sup>int</sup> as described in Figure 5, and the  
1007 percentage of RVFV<sup>+</sup> microglia are shown in (I). Mean fluorescence intensities (MFI) of CD86  
1008 and I-A/I-E expression on microglia (J) and (K), respectively. Data in (I-K) are shown as the  
1009 mean +/- SD. \*\*p<0.01, \*\*\*p<0.001, \*\*\*\*p<0.0001

1010

1011 **Figure 7. Dysregulated pattern of lymphocyte infiltration and gene expression in brains of**  
1012 ***Mavs*<sup>-/-</sup> mice.** UMAP plots depicting cell clusters of lymphoid lineage cells derived from WT and  
1013 *Mavs*<sup>-/-</sup> brains, +/- RVFV infection. Cell types (A) or conditions (B) are color coded. Feature  
1014 plots showing expression of cell type specific markers are shown in (C). The distribution of  
1015 lymphoid lineage cell types within brains of infected mice (D). Violin plots depicting the relative  
1016 expression of selected genes within all lymphocytes are shown in (E). Quantitation of IFN- $\gamma$  is  
1017 depicted in (F). \*p<0.05

1018

1019 **Figure S1. Infection of primary microglia is not dependent upon genotype.** Primary  
1020 microglia derived from WT or the indicated genetically deficient mice were infected with RVFV  
1021 MP-12 and the percentage of cells positive for RVFV was assessed by flow cytometry.

1022

1023 **Figure S2. Expression of activation markers is not dependent on TLR3 or TLR7.** Microglia  
1024 derived from WT or *Tlr3*<sup>-/-</sup> (A) or *Tlr7*<sup>-/-</sup> (B) mice were infected with RVFV MP-12 and at 18-24  
1025 hours post-infection, cells were harvested for flow cytometry. The expression levels of the  
1026 indicated activation markers were assessed on uninfected cells (black bars), uninfected cells in  
1027 culture with infected cells (uninf (w/ inf), gray bars), and infected cells (inf, white bars) and  
1028 shown as the mean fluorescence intensity of the indicated activation markers. Data are shown as  
1029 the mean +/- SD \*p <0.05, \*\*p<0.01, \*\*\*p<0.001, \*\*\*\*p<0.0001

1030

1031 **Figure S3. RVFV is detected in the brain on day 7 post infection.** WT mice were infected  
1032 intranasally with 5x10<sup>5</sup> PFU RVFV MP-12 and brains were harvested on the indicated day post  
1033 infection for viral quantitation.

1034

1035 **Figure S4. CD80 expression on microglia.** Mean fluorescence intensity of CD80 on microglia  
1036 isolated from the brains of WT and *Mavs*<sup>-/-</sup> mice, +/- RVFV infection.

1037

1038 **Figure S5. Microglia and myeloid cells from *Mavs*<sup>-/-</sup> infected brains display lower levels of**  
1039 **cytokine gene expression.**

1040
